# Supplementary material
Source: PubMed Central journal article supplement (PMC4320661)
Supplement: NIHMS643651-supplement-2.pdf [file NIHMS643651-supplement-2.pdf]

## Supplementary Information

# Genome-wide detection of DNA double-stranded breaks induced by engineered nucleases

Richard L. Frock<sup>1,2,3,4</sup>, Jiazhi Hu<sup>1,2,3,4</sup>, Robin M. Meyers<sup>1,2,3</sup>, Yu-Jui Ho<sup>1,2,3</sup>, Erina Kii<sup>1,2,3</sup> & Frederick W. Alt<sup>1,2,3,5</sup>

<sup>1</sup>Program in Cellular and Molecular Medicine, Boston Children's Hospital, Boston, Massachusetts, USA

<sup>2</sup>Department of Genetics, Harvard Medical School, Boston, Massachusetts, USA

<sup>3</sup>Howard Hughes Medical Institute, Boston, Massachusetts, USA

<sup>4</sup>Equal Contribution

<sup>5</sup>Correspondence should be addressed to alt@enders.tch.harvard.edu

| Contents                                                                                                                      |       |
|-------------------------------------------------------------------------------------------------------------------------------|-------|
| <b>Supplementary Fig. 1:</b> Genome dot plot of Cas9:RAG1A prey junctions using LAM-PCR HTGTS                                 | 2     |
| <b>Supplementary Fig. 2:</b> HTGTS libraries from Cas9:RAG1A-D                                                                | 3     |
| <b>Supplementary Fig. 3:</b> HTGTS library junction compositions                                                              | 4     |
| <b>Supplementary Fig. 4:</b> Hotspots are related to recurrent off-target nuclease activity                                   | 5     |
| <b>Supplementary Fig. 5:</b> Off-target detection with varied culturing times post-transfection                               | 6     |
| <b>Supplementary Fig. 6:</b> Cas9:RAG1B bait HTGTS library from A549 cells                                                    | 7     |
| <b>Supplementary Fig. 7:</b> Prey joining outcomes at the bait break-site                                                     | 8     |
| <b>Supplementary Fig. 8:</b> Cas9n:RAG1A/G, A/E, A/F paired nickase targets                                                   | 9     |
| <b>Supplementary Fig. 9:</b> ATM and c-MYC TALEN HTGTS libraries                                                              | 10-11 |
| <b>Supplementary Fig. 10:</b> Analysis of I-SceI OT sites recovered by Cas9:RAG1B bait DSBs                                   | 12    |
| <b>Supplementary Fig. 11:</b> Sequence analysis and in vitro cleavage assay for Cas9:EMX1 and Cas9:VEGFA                      | 13    |
| <b>Supplementary Fig. 12:</b> IR-treatment increases break-site chromosome junction enrichment                                | 14    |
| <b>Supplementary Fig. 13:</b> Cas9:RAG1B bait wide-spread low-level DNA DSB activity detection assay                          | 15    |
| <b>Supplementary Fig. 14:</b> ATM TALEN bait HTGTS libraries with increasing concentrations of transfected ATM TALEN plasmids | 16    |
| <b>Supplementary Fig. 15:</b> RAG1B bait ATM TALEN titration HTGTS libraries                                                  | 17-18 |
| <b>Supplementary Fig. 16:</b> Increased amounts of Cas9:RAG1B plasmid does not greatly increase non-specific DSB activity     | 19    |
| <b>Supplementary Table 1:</b> Cas9 and TALEN target sites used to generate HTGTS libraries                                    | 20-22 |
| <b>Supplementary Table 2:</b> Estimated HTGTS background for various libraries                                                | 23    |
| <b>Supplementary Table 3:</b> Cas9:RAG1A off-target site mismatches and translocations                                        | 24    |
| <b>Supplementary Table 6:</b> ATM TALEN off-target site sequences                                                             | 25    |
| <b>Supplementary Table 7:</b> C-MYC TALEN off-target site sequences                                                           | 26    |
| <b>Supplementary Table 4:</b> Cas9:RAG1B and I-SceI off-target site mismatches and translocations                             | 27    |
| <b>Supplementary Table 5:</b> Cas9:EMX1 and Cas9:VEGFA off-target site mismatches and translocations                          | 28    |
| <b>Supplementary Table 8:</b> Translocation cloning and off-target oligos                                                     | 29-31 |
| <b>Supplementary References</b>                                                                                               | 32    |

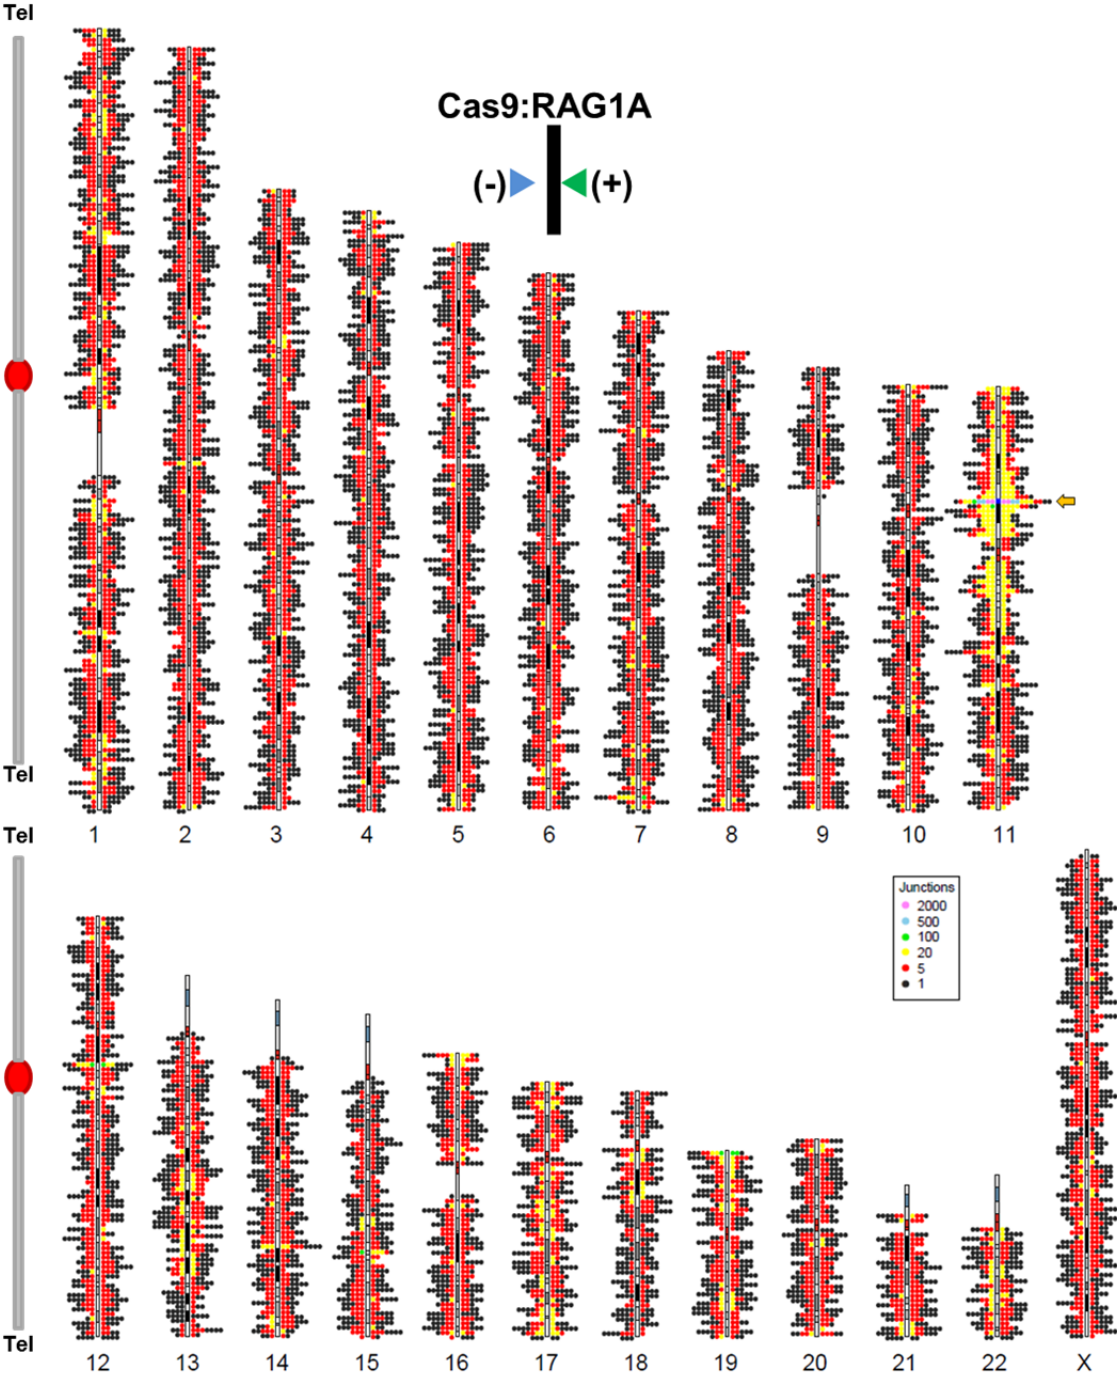

**Supplementary Figure 1.** Human genome dot plot of Cas9:RAG1A prey junctions using LAM-PCR HTGTS. Joins to the (-) and (+) chromosomal orientations are displayed on the left and right sides of each chromosome respectively. Colored dots represent prey junction frequency within a 1.5Mb binned region. The following colors indicate the following frequencies: black = 1, red = 5, yellow =20, green = 100 blue = 500 pink =2,000. Barren areas of variable length occurred in and around centromeres or rDNA genes, consistent with mapping difficulties in these highly repetitive regions<sup>47</sup>. Total junctions listed: 61,700; N=2.

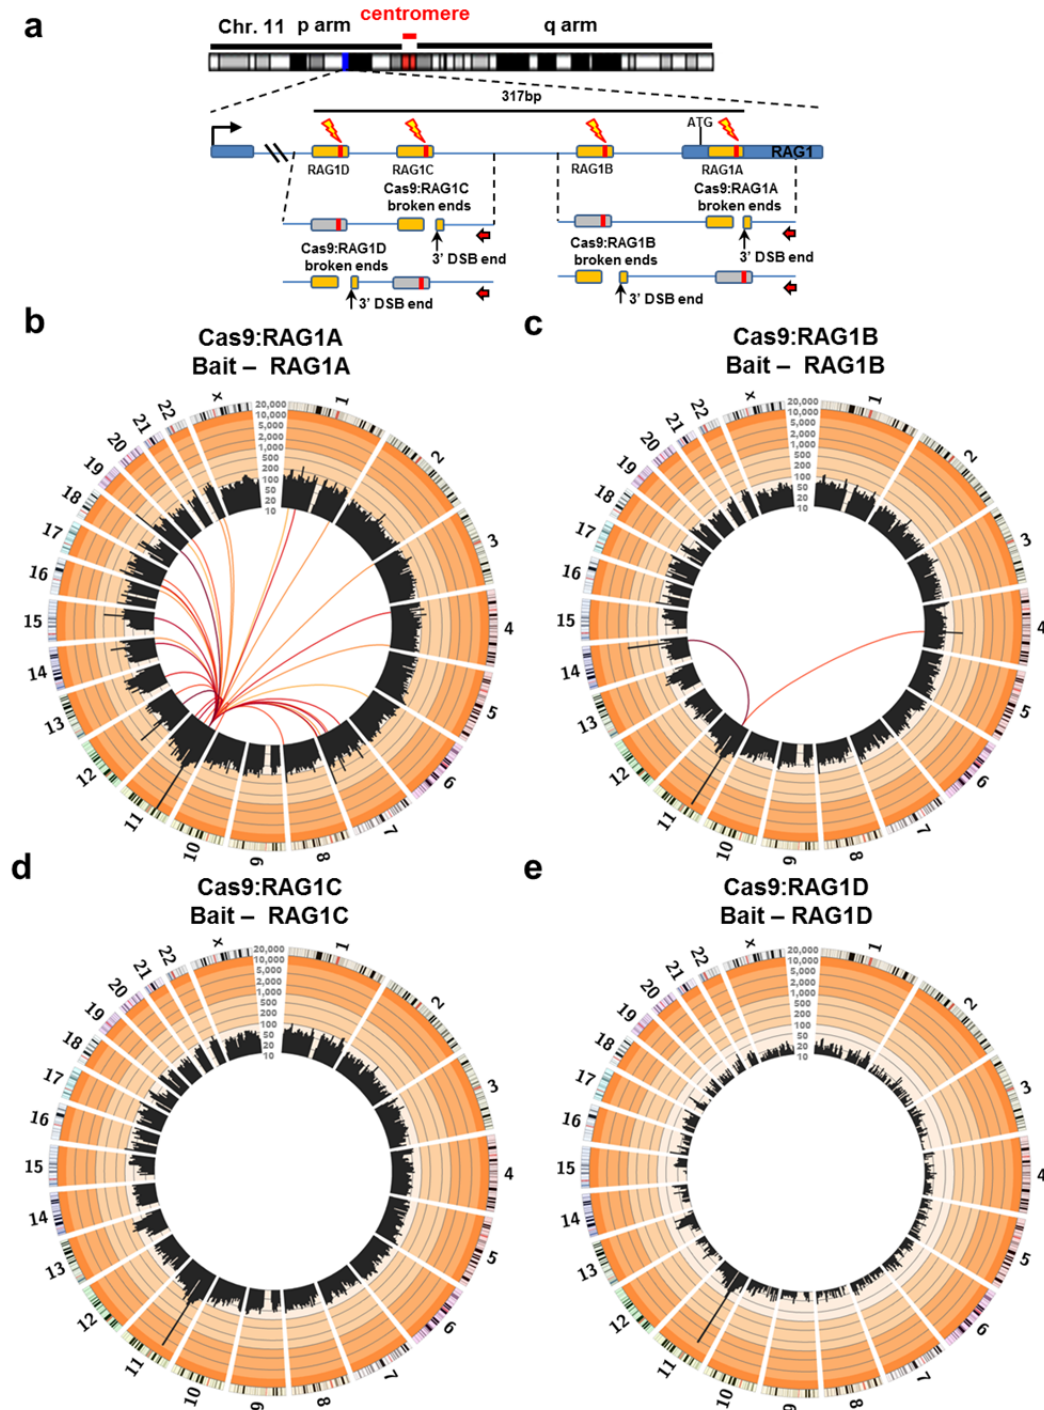

**Supplementary Figure 2.** HTGTS libraries from Cas9:RAG1A-D. (a) RAG1 locus indicating RAG1B, RAG1C, and RAG1D targeted sites. Red arrow indicates cloning primer. (b-e) Circos plots show (b) Cas9:RAG1A, (c) Cas9:RAG1B, (d) Cas9:RAG1C, and (e) Cas9:RAG1D HTGTS libraries. No recurrent hotspots were detected for RAG1C and D. Biological replicates: N=6 each. Circos plots are presented as similarly as described in Fig 1 (see legend); junction scale: 10-20,000. See Supplementary Table 1 for total library sizes.

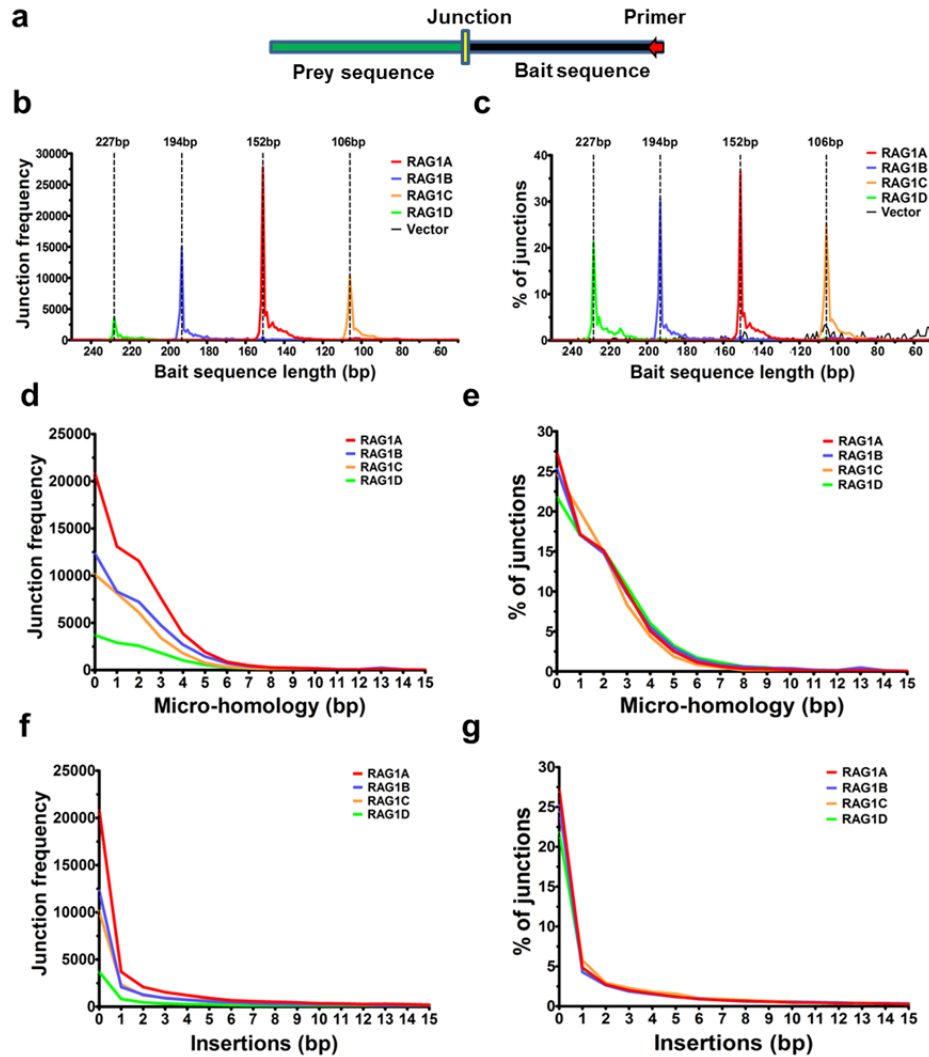

**Supplementary Figure 3.** HTGTS library junction compositions. (a) Filtered DNA sequence reads are composed of (from right to left) the bait primer (red arrow), the bait sequence (black rectangle) leading up to the junction (yellow box), followed by the aligned prey sequence (green rectangle). (b,c) Bait sequence junction distribution corresponds to predicted break-site position for Cas9:RAG1A-D libraries displayed as either (b) total junctions or (c) percent junctions (black dashed lines; N=6 each). Due to the constraints of sequencing length for Miseq and, correspondingly, primer positions from the bait DSB, bait junctions predominately display short resections (up to 25bp for most junctions) with some displaying longer resections leading up to the primer position; bait resections beyond the primer position are not detected with this method. However, this is not true for prey junctions, and for those which map to the break-site (See Supplementary Figure 7), we observe that >99% of resection events are within 15kb with an average of around 2-3 kb while less than 1% extends for up to 250-300 kb. (d-g) Junctions from HTGTS libraries are primarily composed of short micro-homologies and direct joins with a smaller proportion of junctions containing base pair insertions of variable lengths.

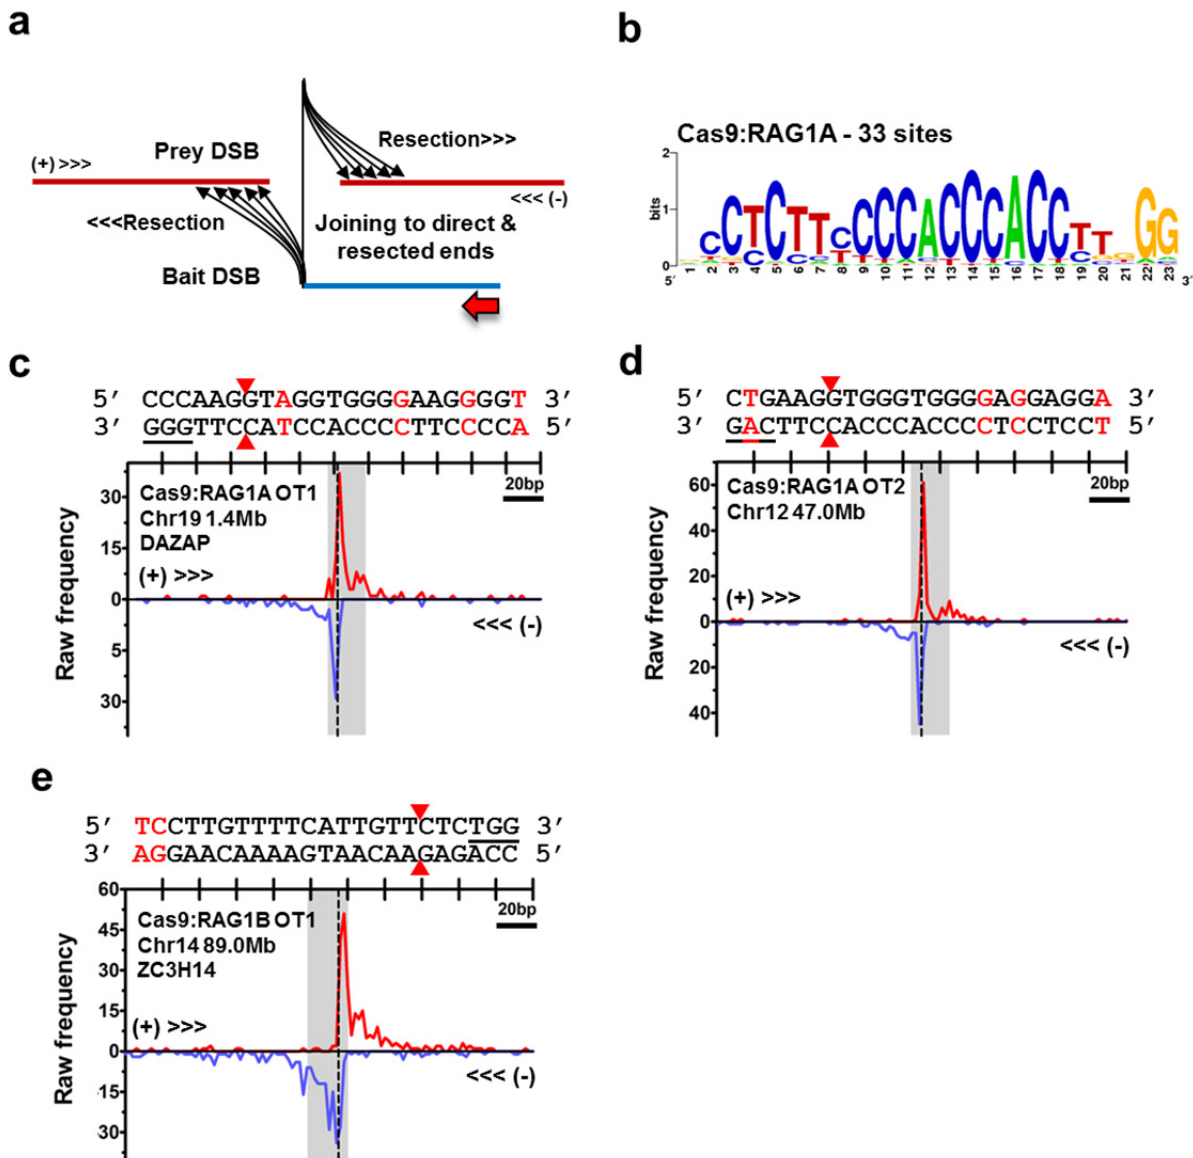

**Supplementary Figure 4.** Hotspots are related to recurrent off-target nuclease activity. (a) Diagram of bait 3' DSB ends translocating to a separate broken end resulting in direct and resected joins in both orientations. (b) Guide RNA sequence preference extrapolated from RAG1A OT sites. (c-e) Prey joining distribution to select OT sites from (c,d) Cas9:RAG1A or (e) Cas9:RAG1B bait DSBs. Plus and minus orientation junction enrichment are indicated by red and blue curves respectively. Dashed lines indicate predicted off-target cleavage site. Shaded area represents off-target sequence listed above each plot; red text indicates mismatch from targeted sequence and underlined nucleotides indicate the PAM.

## Supplementary Figure 5

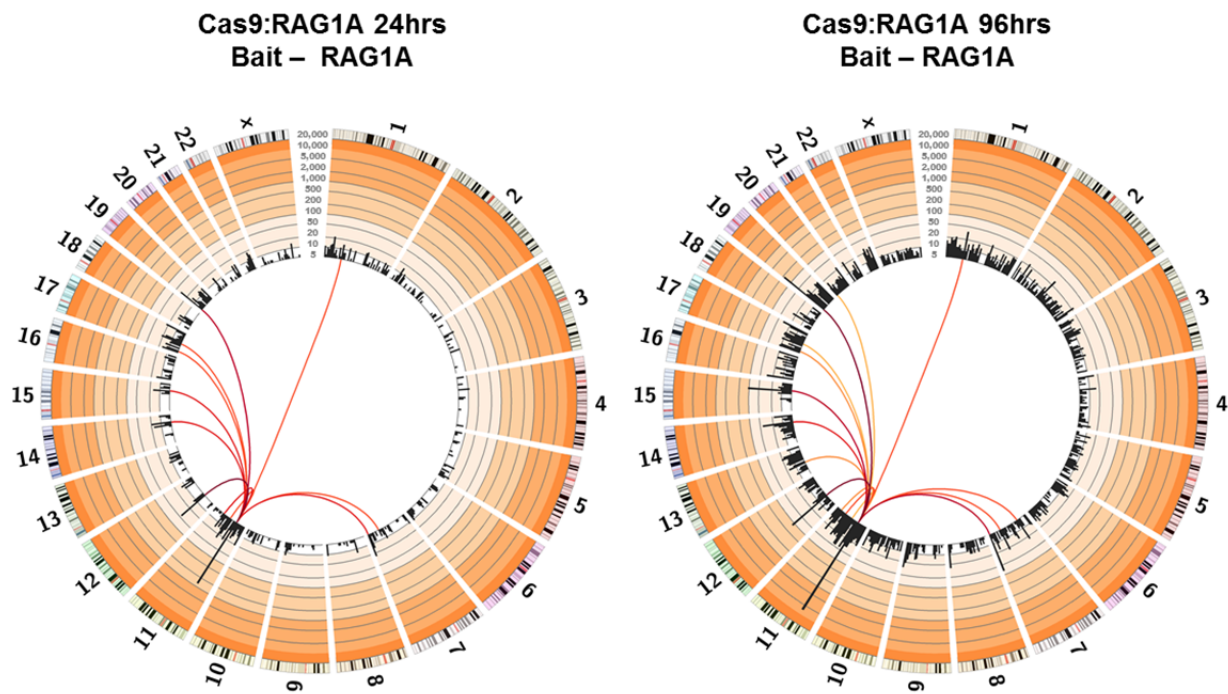

**Supplementary Figure 5.** Off-target detection with varied culturing times post-transfection. Cas9:RAG1A-transfected 293T cells were cultured for 24hrs and 96hrs prior to DNA collection. HTGTS libraries indicate identification of similar off-target sites with fewer off-targets detected at 24hrs. Library replicates: 24hrs: N=2; 96hrs: N=2. Circos plots are similarly presented as in Fig. 1 (see legend). Junction scale range: 5-20,000.

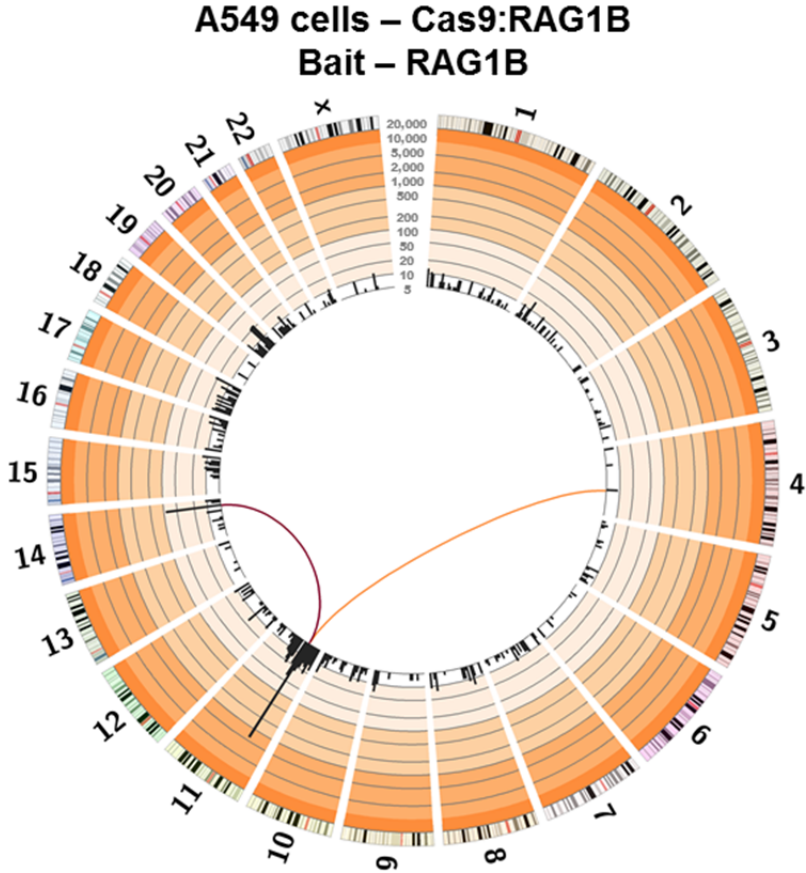

**Supplementary Figure 6.** Cas9:RAG1B bait HTGTS library from A549 cells. Circos plot with red to yellow lines (high to low hotspot enrichment) linking the RAG1B bait to the RAG1B off-target hotspots (N=2). Circos plots are presented as similarly described in Fig. 1 (see legend). Junction scale range: 5-20,000.

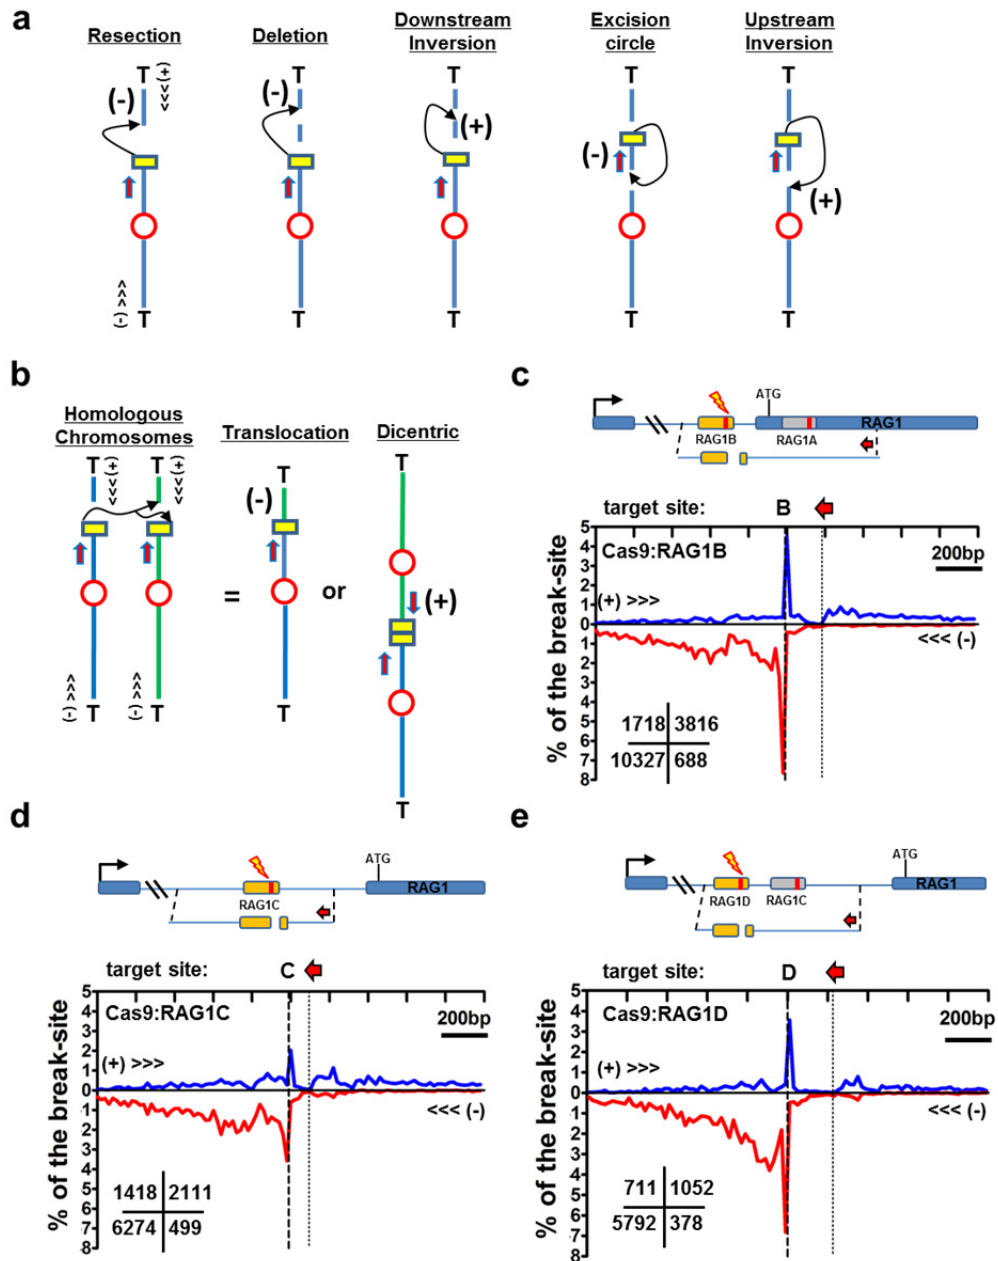

**Supplementary Figure 7.** Prey joining outcomes at the bait break-site. (a) From a single bait DSB, nearby prey junctions are primarily derived from rejoining the original, but resected, DSB. Joining to broken ends of nearby spontaneous DSBs can result in deletions, inversions and excision circles depending on the position of the 2<sup>nd</sup> DSB relative to the bait and which broken end of the 2<sup>nd</sup> DSB is joined. (b) Targeting endogenous loci typically include the homologous chromosome and the homologous target site. Thus, joins to the homologous chromosome can occur which can lead to the formation of dicentric chromosomes. (c-e) Break-site prey junction enrichment for (c) Cas9:RAG1B, (d) Cas9:RAG1C, and (e) Cas9:RAG1D (1kb regions flanking the break-site). Orange boxes indicate Cas9 targeted site for the respective gRNA. Red bars indicate cleavage site. Total junctions for each quadrant are listed (N=6 for each).



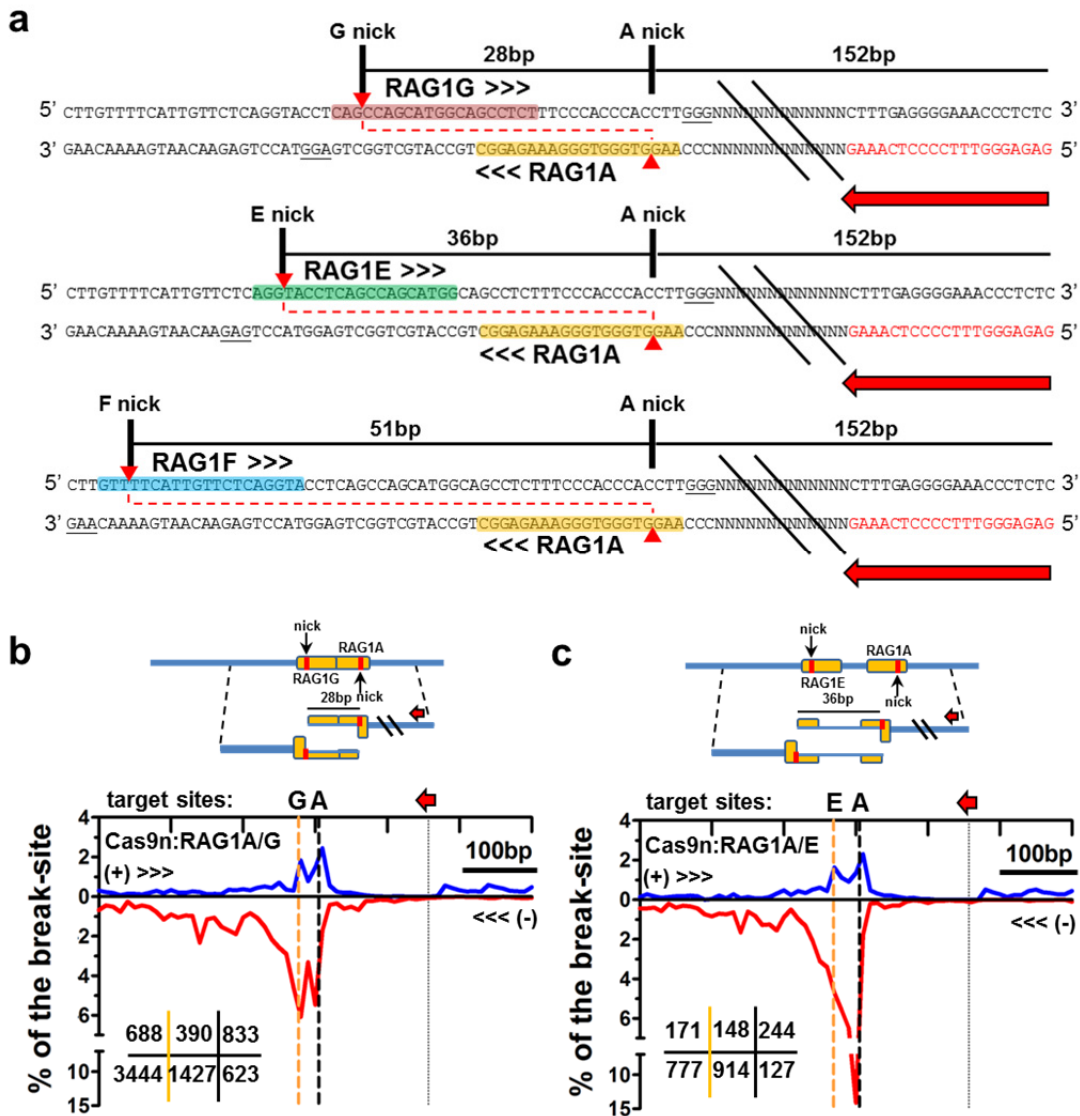

**Supplementary Figure 8.** Cas9n:RAG1A/G, A/E, A/F paired nickase targets. (a) Sequences specific for RAG1A, G, E, and F gRNAs (yellow, red, green and blue highlight respectively) with variable length 5' overhangs (dashed lines connecting red arrowheads; PAM is underlined). (b,c) Prey junction distribution at the break-site for (b) Cas9n:RAG1A/G (N=6) and (c) Cas9n:RAG1A/E (N=2). Orange dashed lines indicate the (b) RAG1G or (c) RAG1E site relative to the RAG1A site (black dashed line). Break-site prey junction totals within 0.3kb are listed for each section including prey junctions between off-set nick sites. Preliminary data of RAG1A single nicking experiments do not yield high numbers of HTGTS junctions and no HTGTS hotspots of any kind. However, we detect small numbers of junctions at the break-site, which are 2-fold greater than vector control, indicating that nicks indeed can be converted into DSBs. In these controls, there appears to be few if any translocations to the homologous chromosome. Future studies using a separate bait-site (using a different nuclease class) to capture single nick DSBs (co-expression assay) will yield more information into the mechanisms associated with Cas9n-related single nick-driven DSBs.

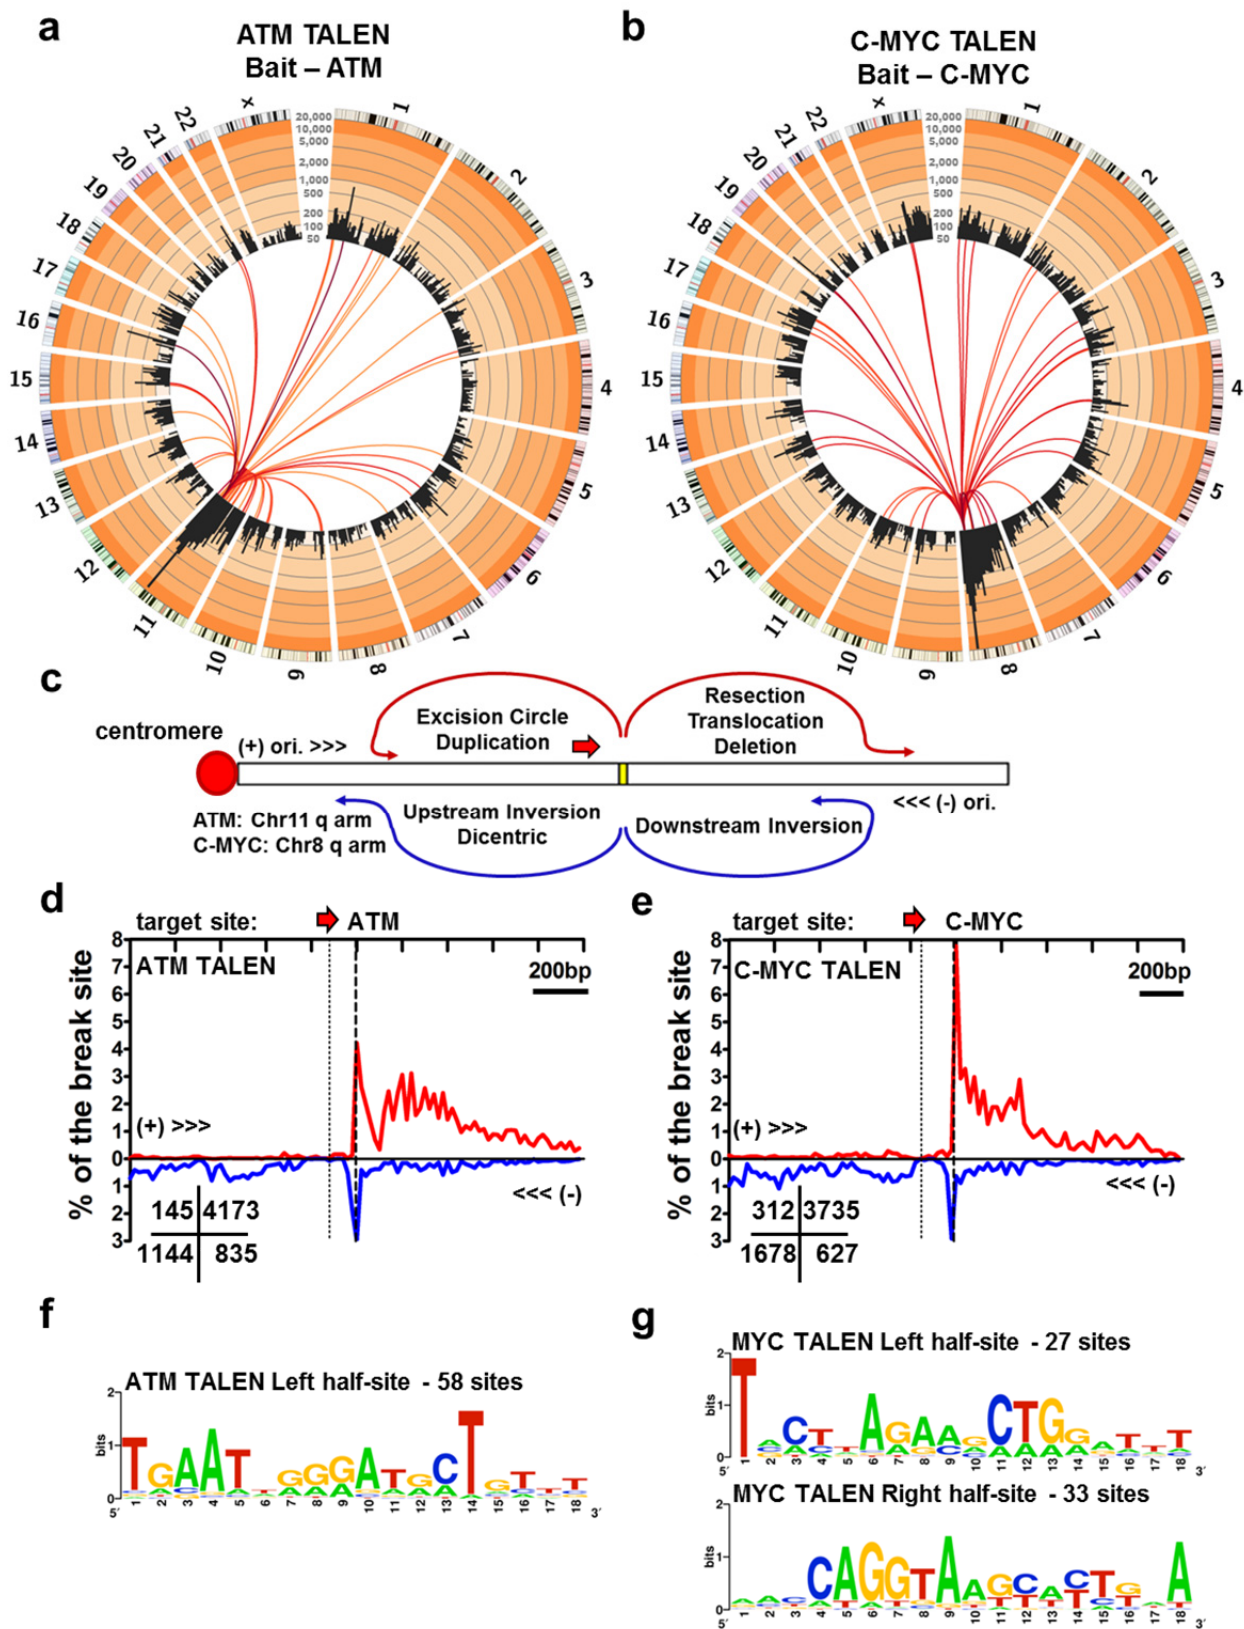

**Supplementary Figure 9.** ATM and c-MYC TALEN HTGTS libraries. (a,b) Circos plots of genome-wide prey junctions cloned from the (a) ATM TALEN (left circos) and the (b) c-MYC TALEN (right circos) on chromosomes 11 and 8 respectively. Circos plots are similarly presented as in Fig. 1 (see legend). Junction scale range: 50-20,000. Interior colored lines linking the bait to prey hotspots (gradient: dark red to yellow = high to low enrichment) display the top ten percent of off-target sites identified for each TALEN library; N=3 each. (c) Cloning from 5' bait DSBs in TALEN libraries and outcomes associated with local joining (see Supplementary Figure 7a,b). (d,e) Relative to the primer (red arrow), downstream prey junctions beyond the break-site (middle dashed line) predominantly represent resections and deletions. Dicentric-forming upstream inversions at the break-site are enriched. Numbers in the lower left corner are total frequencies for each quadrant (N=3 each). (f) ATM and (g) C-MYC TALEN sequence preference derived from OT half-sites (Supplementary Tables 4 & 5). No ATM TALEN right half-site analysis was performed since only two sites were described.

Supplementary Figure 10

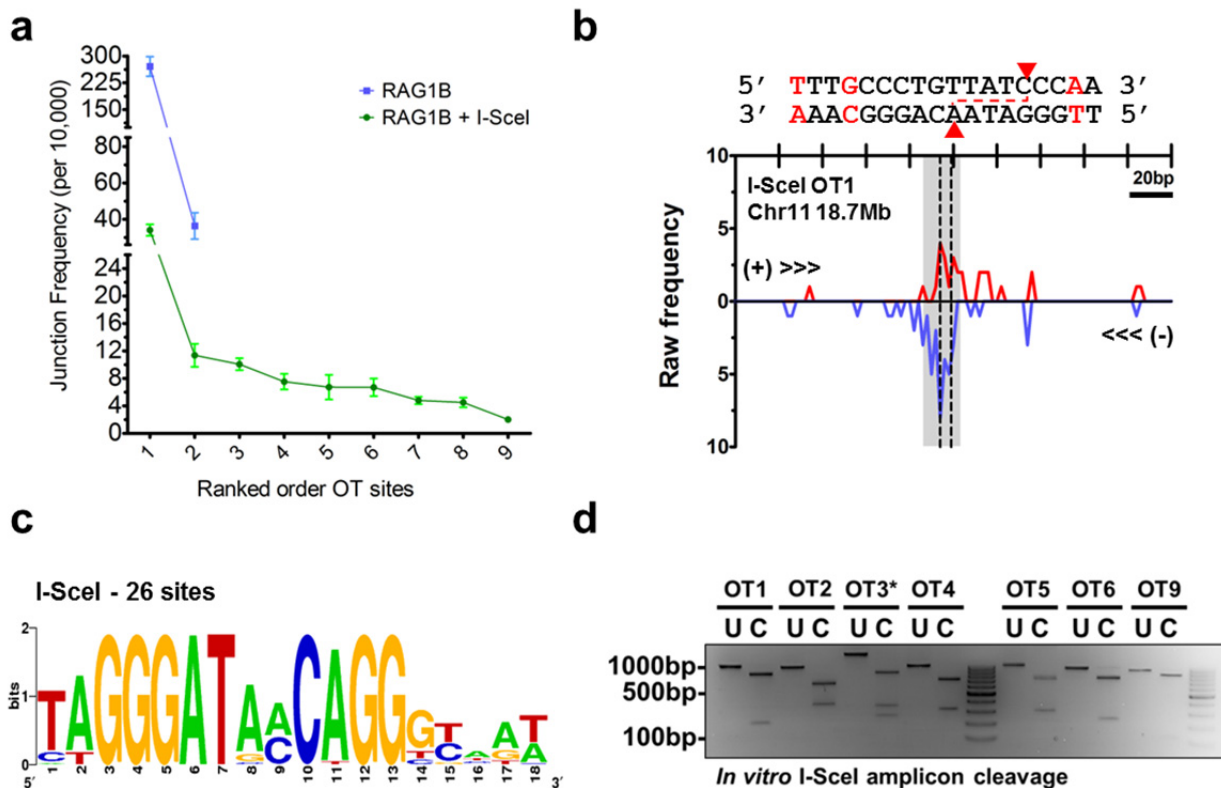

**Supplementary Figure 10.** Analysis of I-SceI OT sites recovered by Cas9:RAG1B bait DSBs. (a) Relative junction frequency of RAG1B (N=6; blue) and (b) I-SceI (N=3; green) OTs. Error bars are displayed as S.E.M.. (b) Select I-SceI OT site showing focal prey junction enrichment. Plus and minus orientation junction enrichment are indicated by red and blue curves respectively. Vertical dashed lines indicate predicted off-target cleavage site. Shaded area represents off-target sequence listed above the plot; red text indicates mismatch from targeted sequence. (c) Nuclease sequence preference derived from both human and mouse<sup>23</sup> I-SceI OT sites. (d) I-SceI off-target sites were PCR amplified and either mock digested (U) or digested with I-SceI (C) with most sites efficiently cleaved. Asterisk indicates site with 2 identical off-target sequences.

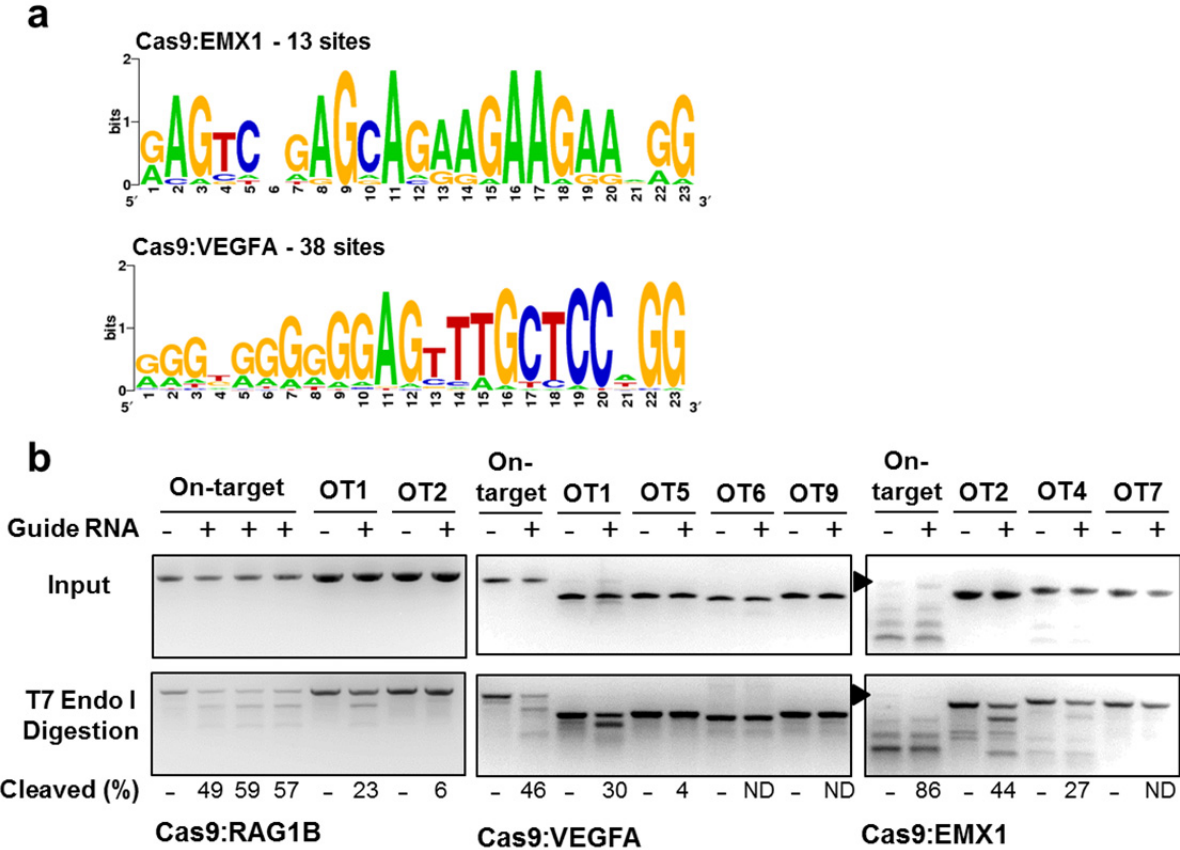

**Supplementary Figure 11.** Sequence analysis and in vitro cleavage assay for Cas9:EMX1 and Cas9:VEGFA OT sites. (a) Nuclease sequence preference derived from Cas9:EMX1 and Cas9:VEGFA OT sites. (b) T7 Endonuclease I cleavage assay of RAG1B, VEGFA, and EMX1 gRNA on- and off-target sites. 293T genomic DNA sources were from non-transfected, Cas9:RAG1B alone, or in combination with VEGFA or EMX1 gRNAs. For Cas9:EMX on-target, black triangles indicate correct germline band. See online methods for measuring amplicon cleavage.

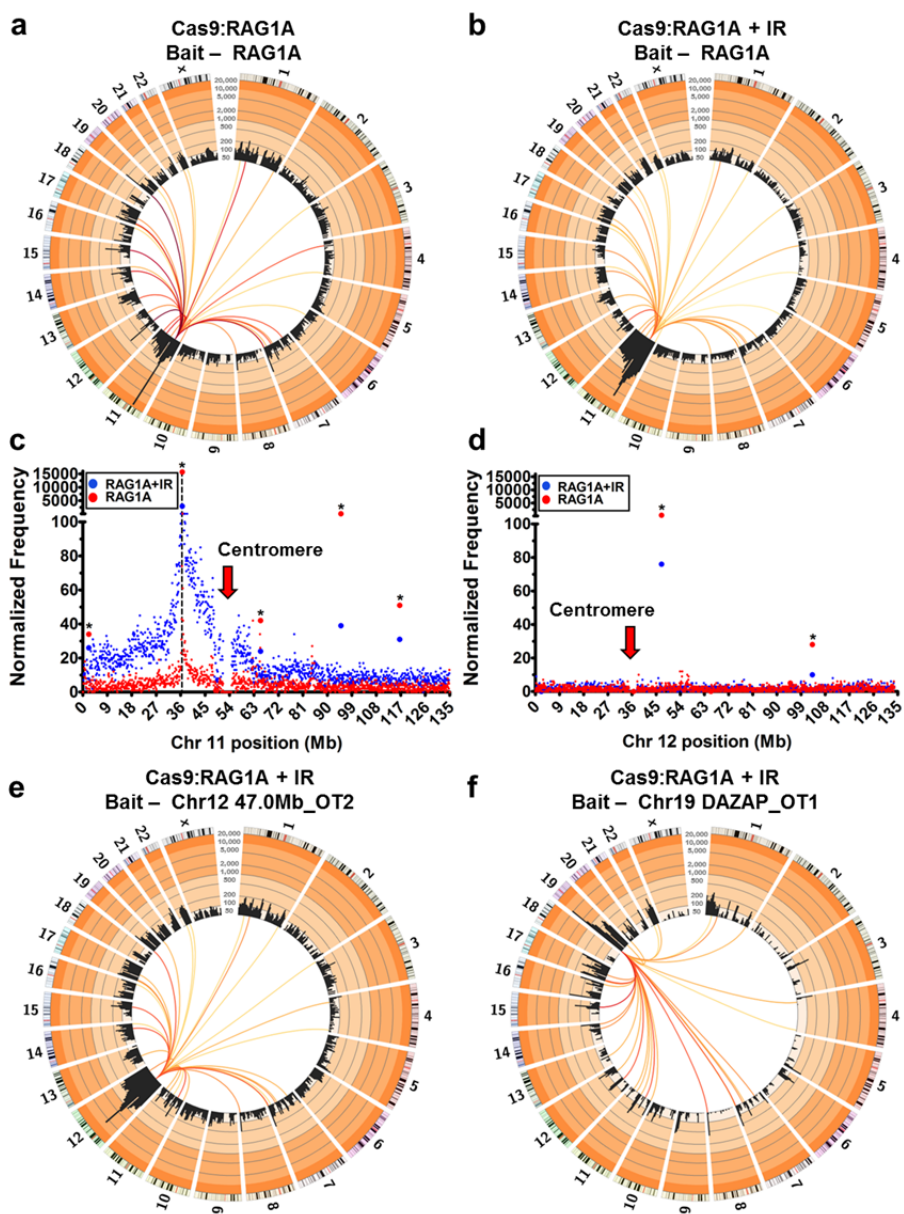

**Supplementary Figure 12.** IR-treatment increases break-site chromosome junction enrichment. (a,b) Circos plot comparison of (a) Cas9:RAG1A and (b) Cas9:RAG1A + IR libraries normalized to 75,000 junctions (N=6 and N=3 respectively). Note the change in dark red colored lines to lighter orange/yellow colored lines indicating a decrease in hotspot junction enrichment. (c,d) Dot plot of Cas9:RAG1A (red) and Cas9:RAG1A + IR (blue) (c) across the break-site chromosome 11 and (d) across a similar sized chromosome 12. Dot scale: 100kb. Enlarged dots with asterisks signify RAG1A OT sites or the on-target site (at the dashed line). (e,f) Circos plots of Cas9:RAG1A + IR OT bait HTGTS libraries from (e) chromosome 12 and (f) chromosome 19 (N=3 each). Maximum ranges for OT sites were derived from RAG1A chromosome 12 and chromosome 19 bait OT libraries respectively. Circos plots are similarly presented as in Fig. 1. Junction scale: 50-20,000.

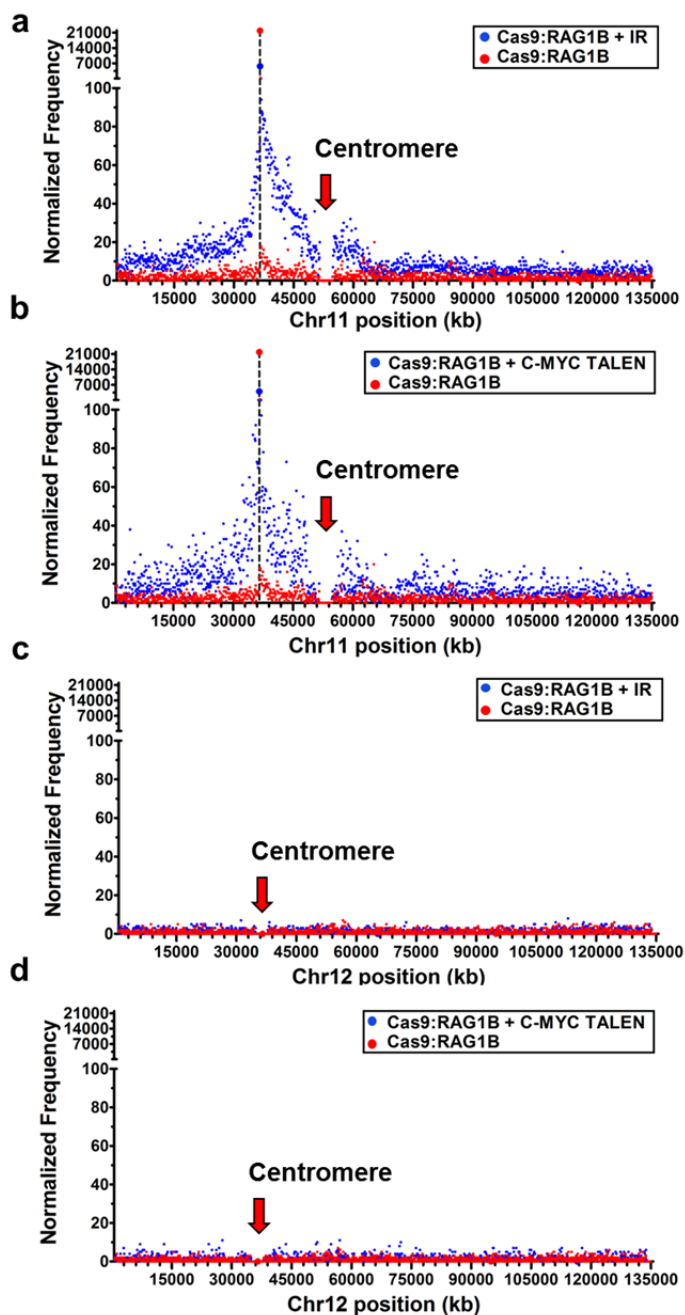

**Supplementary Figure 13.** Cas9:RAG1B bait wide-spread, low level DSB activity detection assay. (a-d) Dot plot of break-site chromosome junctions from (a,b) RAG1B (N=6), (a) RAG1B + IR (N=3), and (b) RAG1B + C-MYC TALEN (N=3) HTGTS libraries using RAG1B as bait. A similar sized chromosome (12) is also displayed for (c,d) RAG1B, (c) RAG1B + IR, and (d) RAG1B + C-MYC TALEN. Dot scale: 100kb. Dashed line indicates break-site with enlarged dots representing the 100kb region of the break-site. For all HTGTS libraries shown in the figure, junctions within C-MYC OT sites (200 chromosome 11 sites, mean size/site: 990bp) were removed prior to normalization at 59,830 junctions.

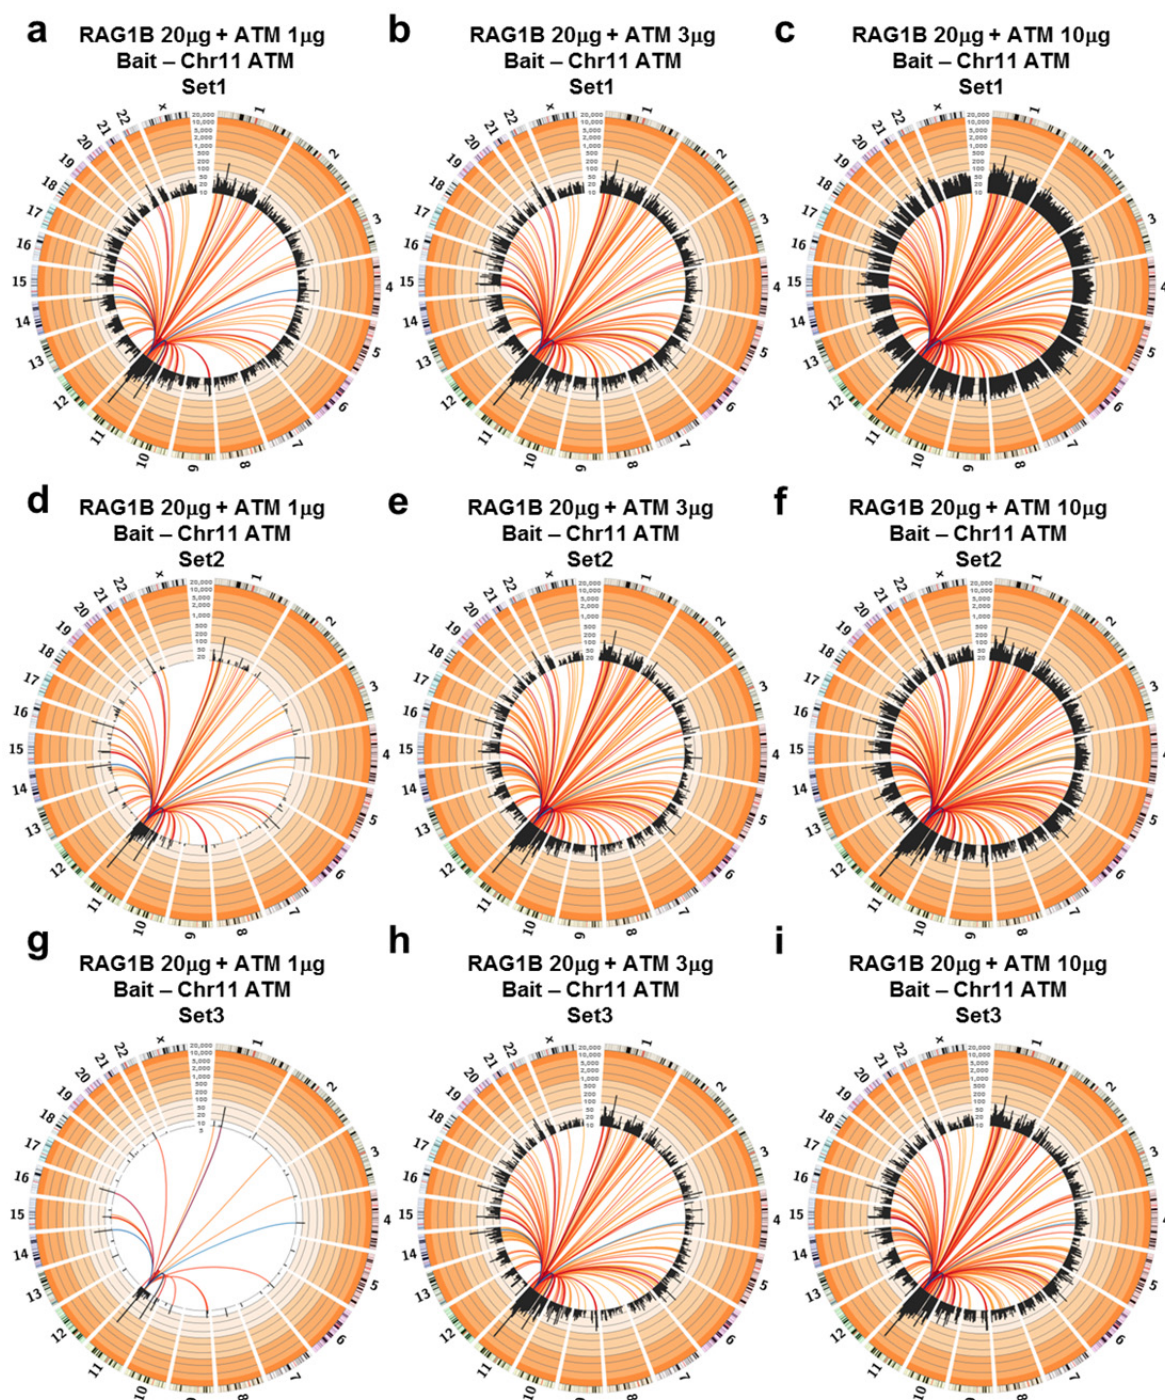

**Supplementary Figure 14.** ATM TALEN bait HTGTS libraries with increasing concentrations of transfected ATM TALEN plasmids. (a-i) Circos plots displaying additional replicates of titrated ATM TALEN bait plasmids at (a,d,g) 1 $\mu$ g, (b,e,h) 3 $\mu$ g, and (c,f,i) 10 $\mu$ g each along with 20 $\mu$ g of Cas9:RAG1B prey plasmid as (a-c) the 1<sup>st</sup> set, (d-f) 2<sup>nd</sup>, and (g-i) 3<sup>rd</sup> replicate sets. The blue colored lines connect the ATM bait to RAG1B OT prey hotspots, and the red to yellow colored lines connect ATM bait to ATM OT prey hotspots. Circos plots are presented as similarly described in Fig. 1. Junction scale: set1:10-20,000; set 2: 20-20,000; set 3: 5- or 10-20,000.



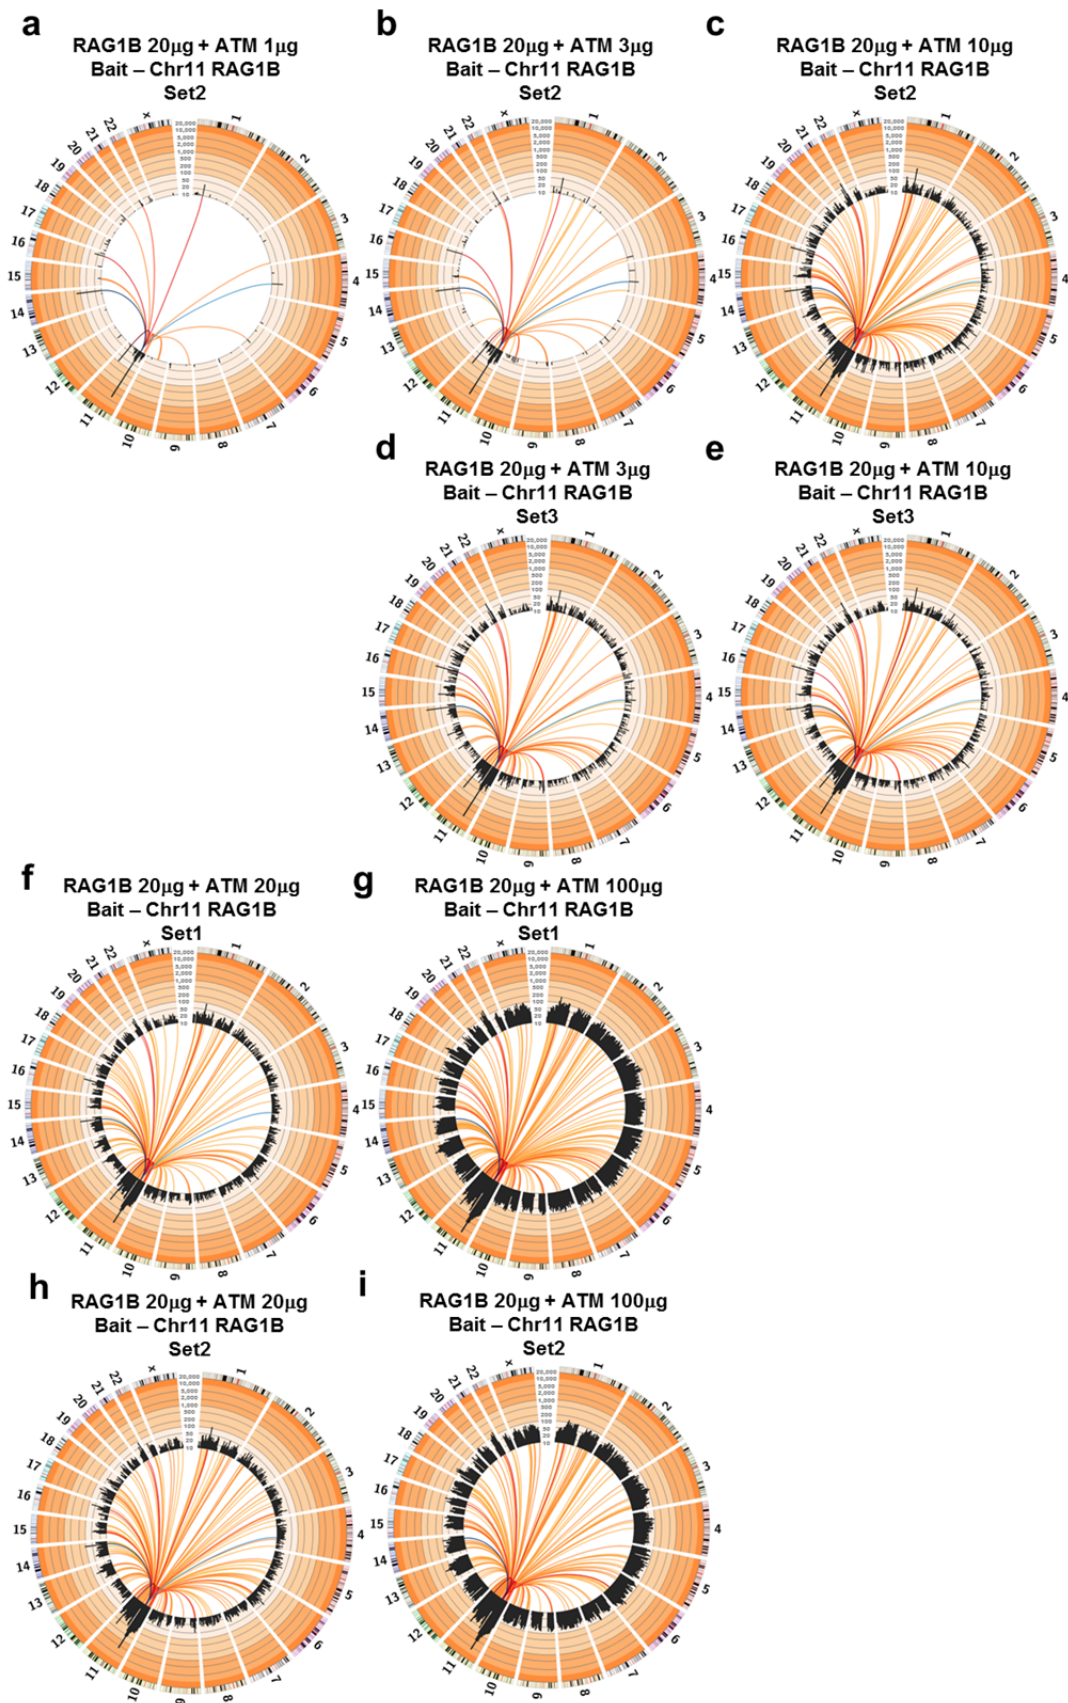

**Supplementary Figure 15.** RAG1B bait ATM TALEN titration HTGTS libraries. Circos plots showing additional biological replicate sets of ATM titration RAG1B bait libraries for (a-e) 1-10 $\mu$ g of transfected ATM TALEN plasmids from Figure 5, and two replicate sets of RAG1B bait libraries with 20 and 100 $\mu$ g of transfected ATM TALEN plasmids. Blue colored lines link the RAG1B bait to RAG1B OT prey hotspots, and red to yellow colored lines link the RAG1B bait to ATM TALEN prey hotspots. Circos plots are presented as similarly described as in Fig. 1 (see legend). Junction scale: 10-20,000.

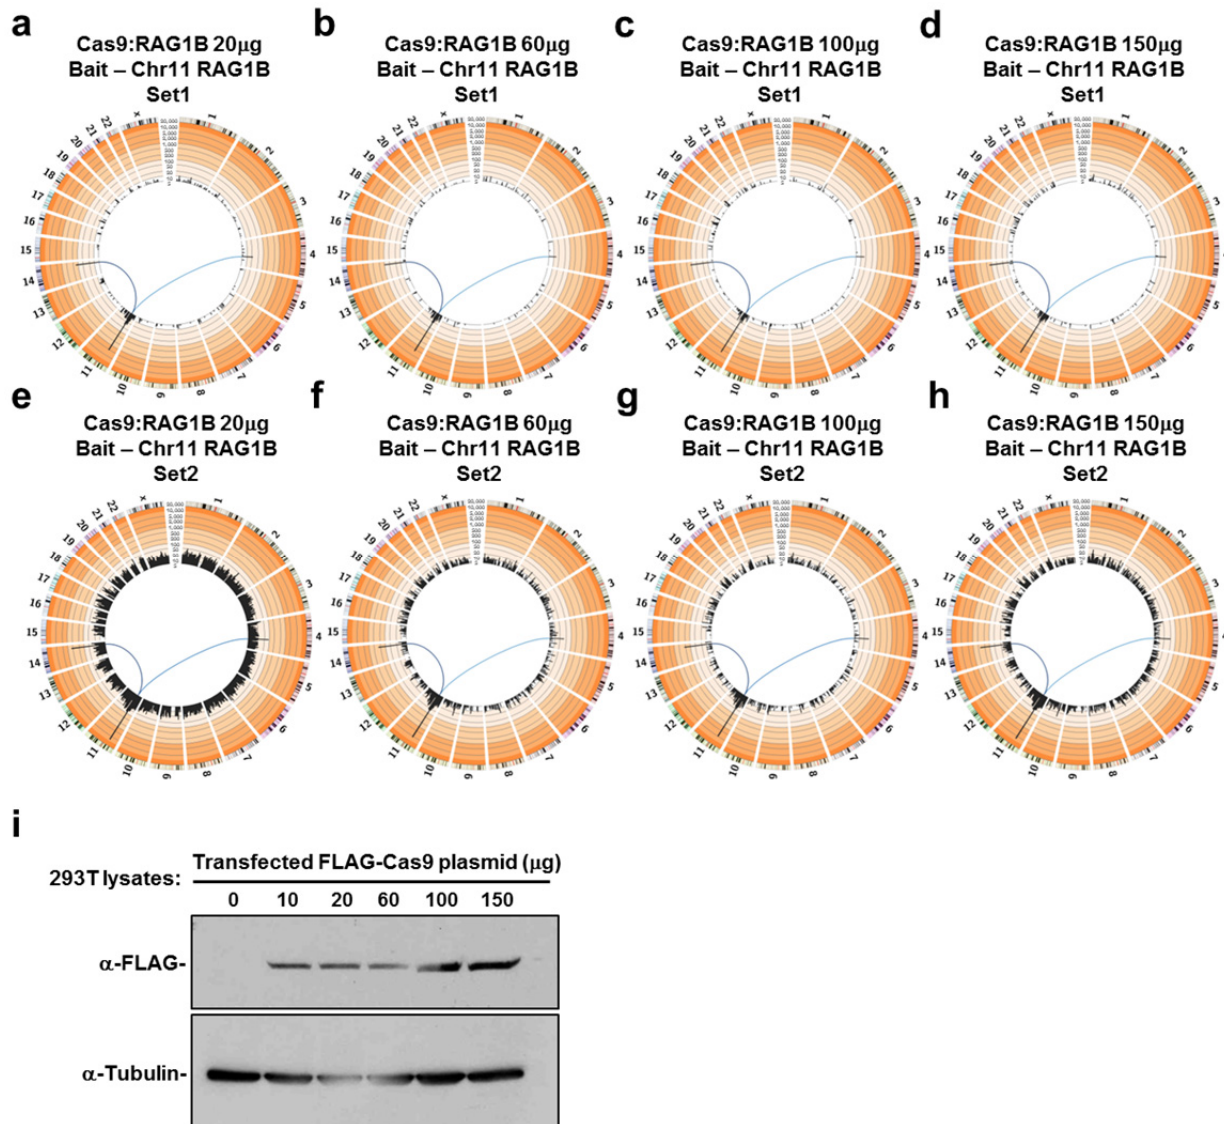

**Supplementary Figure 16.** Increased amounts of Cas9:RAG1B plasmid does not greatly increase non-specific DSB activity. (a-h) Increased amounts of transfected Cas9:RAG1B plasmid DNA at (a,e) 20µg, (b,f) 60µg, (c,g) 100µg, and (d,h) 150µg Cas9:RAG1B plasmid for (a-d) set1 and (e-h) set 2 HTGTS libraries. (i) Western analysis probing for FLAG-tagged Cas9 and a loading control Tubulin from 293T extracts transfected with increased amounts of Cas9:RAG1B plasmid DNA. Circos plots presented similarly as in Fig. 1 (see legend). Junction scale: 5-20,000.

Supplementary Table 1. Cas9 and TALEN target sites used to generate HTGTS libraries.

**Bait: Cas9 endonuclease**

| Exp          | Nuclease/Locus          | GFP | Total DNA    | Method  | Library  | Total Bait aligned | Filtered Junctions |
|--------------|-------------------------|-----|--------------|---------|----------|--------------------|--------------------|
| #1           | Cas9:RAG1A              | 81% | 100µg        | EM-PCR  | 1        | 1,385,548          | 5,373              |
| #2           | Cas9:RAG1A              | 45% | 100µg        | EM-PCR  | 1        | 1,188,505          | 2,846              |
| #3           | Cas9:RAG1A              | 76% | 100µg        | EM-PCR  | 1        | 837,126            | 2,836              |
| #4           | Cas9:RAG1A              | 89% | 100µg        | EM-PCR  | 1        | 1,123,900          | 3,619              |
| #5           | Cas9:RAG1A              | 90% | 50µg         | LAM-PCR | 1        | 1,523,373          | 33,122             |
| #6           | Cas9:RAG1A              | 91% | 50µg         | LAM-PCR | 1        | 1,640,590          | 42,911             |
| <b>TOTAL</b> |                         |     | <b>500µg</b> |         | <b>6</b> | <b>7,699,042</b>   | <b>90,707</b>      |
| #1           | Cas9:RAG1A – 24hrs      | 42% | 50µg         | LAM-PCR | 1        | 1,407,635          | 2,501              |
| #2           | Cas9:RAG1A – 24hrs      | 46% | 50µg         | LAM-PCR | 1        | 646,784            | 1,898              |
| <b>TOTAL</b> |                         |     | <b>100µg</b> |         | <b>2</b> | <b>2,054,419</b>   | <b>4,399</b>       |
| #1           | Cas9:RAG1A – 96hrs      | 62% | 50µg         | LAM-PCR | 1        | 1,551,789          | 9,550              |
| #2           | Cas9:RAG1A – 96hrs      | 72% | 50µg         | LAM-PCR | 1        | 811,246            | 4,045              |
| <b>TOTAL</b> |                         |     | <b>100µg</b> |         | <b>2</b> | <b>2,363,035</b>   | <b>13,595</b>      |
| #1           | Cas9:RAG1A+IR           | 86% | 50µg         | LAM-PCR | 1        | 777,941            | 62,344             |
| #2           | Cas9:RAG1A+IR           | 85% | 50µg         | LAM-PCR | 1        | 949,984            | 83,302             |
| #3           | Cas9:RAG1A+IR           | 86% | 50µg         | LAM-PCR | 1        | 765,342            | 60,525             |
| <b>TOTAL</b> |                         |     | <b>150µg</b> |         | <b>3</b> | <b>2,493,267</b>   | <b>206,171</b>     |
| #1           | Cas9:RAG1A OT Chr19     | 81% | 50µg         | LAM-PCR | 1        | 1,433,690          | 3,483              |
| #2           | Cas9:RAG1A OT Chr19     | 90% | 50µg         | LAM-PCR | 1        | 1,343,499          | 10,878             |
| #3           | Cas9:RAG1A OT Chr19     | 91% | 50µg         | LAM-PCR | 1        | 1,275,773          | 8,771              |
| <b>TOTAL</b> |                         |     | <b>150µg</b> |         | <b>3</b> | <b>4,052,962</b>   | <b>23,132</b>      |
| #1           | Cas9:RAG1 A OT Chr19+IR | 86% | 50µg         | LAM-PCR | 1        | 921,997            | 15,934             |
| #2           | Cas9:RAG1 A OT Chr19+IR | 85% | 50µg         | LAM-PCR | 1        | 1,214,518          | 22,406             |
| #3           | Cas9:RAG1 A OT Chr19+IR | 86% | 50µg         | LAM-PCR | 1        | 1,357,751          | 21,071             |
| <b>TOTAL</b> |                         |     | <b>150µg</b> |         | <b>3</b> | <b>3,494,266</b>   | <b>59,411</b>      |
| #1           | Cas9:RAG1A OT Chr12     | 81% | 50µg         | LAM-PCR | 1        | 1,252,516          | 746                |
| #2           | Cas9:RAG1A OT Chr12     | 90% | 50µg         | LAM-PCR | 1        | 1,235,424          | 13,702             |
| #3           | Cas9:RAG1A OT Chr12     | 91% | 50µg         | LAM-PCR | 1        | 1,134,490          | 2,711              |
| <b>TOTAL</b> |                         |     | <b>150µg</b> |         | <b>3</b> | <b>3,622,430</b>   | <b>17,158</b>      |
| #1           | Cas9:RAG1A OT Chr12+IR  | 86% | 50µg         | LAM-PCR | 1        | 1,183,240          | 25,223             |
| #2           | Cas9:RAG1A OT Chr12+IR  | 85% | 50µg         | LAM-PCR | 1        | 1,105,648          | 29,601             |
| #3           | Cas9:RAG1A OT Chr12+IR  | 86% | 50µg         | LAM-PCR | 1        | 1,358,359          | 32,528             |
| <b>TOTAL</b> |                         |     | <b>150µg</b> |         | <b>3</b> | <b>3,647,247</b>   | <b>87,352</b>      |
| #1           | Cas9:RAG1A OT Chr7      | 90% | 50µg         | LAM-PCR | 1        | 1,324,361          | 3,077              |
| #2           | Cas9:RAG1A OT Chr7      | 80% | 50µg         | LAM-PCR | 1        | 581,954            | 1,389              |
| #3           | Cas9:RAG1A OT Chr7      | 87% | 50µg         | LAM-PCR | 1        | 1,422,336          | 3,777              |
| <b>TOTAL</b> |                         |     | <b>150µg</b> |         | <b>3</b> | <b>3,328,651</b>   | <b>8,243</b>       |
| #1           | Cas9:RAG1B              | 83% | 100µg        | EM-PCR  | 1        | 1,241,696          | 4,801              |
| #2           | Cas9:RAG1B              | 48% | 100µg        | EM-PCR  | 1        | 1,235,718          | 2,044              |
| #3           | Cas9:RAG1B              | 66% | 100µg        | EM-PCR  | 1        | 798,151            | 1,693              |
| #4           | Cas9:RAG1B              | 87% | 100µg        | EM-PCR  | 1        | 883,814            | 1,554              |
| #5           | Cas9:RAG1B              | 90% | 50µg         | LAM-PCR | 1        | 1,493,069          | 21,720             |
| #6           | Cas9:RAG1B              | 90% | 50µg         | LAM-PCR | 1        | 1,478,753          | 28,036             |
| <b>TOTAL</b> |                         |     | <b>500µg</b> |         | <b>6</b> | <b>7,131,201</b>   | <b>59,848</b>      |
| #1           | Cas9:RAG1B – A549       | 38% | 200µg        | LAM-PCR | 2        | 2,308,874          | 2,489              |
| #2           | Cas9:RAG1B – A549       | 51% | 100µg        | LAM-PCR | 1        | 1,351,727          | 2,540              |
| <b>TOTAL</b> |                         |     | <b>300µg</b> |         | <b>3</b> | <b>3,660,601</b>   | <b>5,029</b>       |
| #1           | Cas9:RAG1B 60µg         | 68% | 50µg         | LAM-PCR | 1        | 891,902            | 11,593             |
| #2           | Cas9:RAG1B 60µg         | 66% | 50µg         | LAM-PCR | 1        | 552,083            | 4,767              |
| <b>TOTAL</b> |                         |     | <b>100µg</b> |         | <b>2</b> | <b>1,443,985</b>   | <b>16,360</b>      |

|              |                             |     |              |         |          |                  |                |
|--------------|-----------------------------|-----|--------------|---------|----------|------------------|----------------|
| #1           | Cas9:RAG1B 100µg            | 65% | 50µg         | LAM-PCR | 1        | 895,365          | 9,819          |
| #2           | Cas9:RAG1B 100µg            | 60% | 50µg         | LAM-PCR | 1        | 1,113,910        | 5,350          |
| <b>TOTAL</b> |                             |     | <b>100µg</b> |         | <b>2</b> | <b>2,009,275</b> | <b>15,169</b>  |
| #1           | Cas9:RAG1B 150µg            | 59% | 50µg         | LAM-PCR | 1        | 1,064,148        | 14,551         |
| #2           | Cas9:RAG1B 150µg            | 52% | 50µg         | LAM-PCR | 1        | 1,104,544        | 5,840          |
| <b>TOTAL</b> |                             |     | <b>100µg</b> |         | <b>2</b> | <b>2,168,692</b> | <b>20,391</b>  |
| #1           | Cas9:RAG1B+IR               | 94% | 50µg         | LAM-PCR | 1        | 1,110,892        | 47,639         |
| #2           | Cas9:RAG1B+IR               | 96% | 50µg         | LAM-PCR | 1        | 1,140,162        | 39,555         |
| #3           | Cas9:RAG1B+IR               | 94% | 50µg         | LAM-PCR | 1        | 1,188,273        | 46,621         |
| <b>TOTAL</b> |                             |     | <b>150µg</b> |         | <b>3</b> | <b>3,439,327</b> | <b>133,815</b> |
| #1           | Cas9:RAG1B +ISceI           | 57% | 50µg         | LAM-PCR | 1        | 988,054          | 15,978         |
| #2           | Cas9:RAG1B +ISceI           | 54% | 50µg         | LAM-PCR | 1        | 1,163,969        | 10,676         |
| #3           | Cas9:RAG1B +ISceI           | 58% | 50µg         | LAM-PCR | 1        | 976,679          | 9,900          |
| <b>TOTAL</b> |                             |     | <b>150µg</b> |         | <b>3</b> | <b>3,128,702</b> | <b>36,554</b>  |
| #1           | Cas9:RAG1B +Cas9:EMX1       | 92% | 50µg         | LAM-PCR | 1        | 1,358,175        | 19,474         |
| #2           | Cas9:RAG1B +Cas9:EMX1       | 87% | 50µg         | LAM-PCR | 1        | 940,919          | 16,730         |
| #3           | Cas9:RAG1B +Cas9:EMX1       | 88% | 50µg         | LAM-PCR | 1        | 699,736          | 714            |
| <b>TOTAL</b> |                             |     | <b>150µg</b> |         | <b>3</b> | <b>2,998,830</b> | <b>36,918</b>  |
| #1           | Cas9:RAG1B +Cas9:VEGFA      | 88% | 50µg         | LAM-PCR | 1        | 1,265,815        | 1,996          |
| #2           | Cas9:RAG1B +Cas9:VEGFA      | 92% | 50µg         | LAM-PCR | 1        | 769,647          | 14,352         |
| #3           | Cas9:RAG1B +Cas9:VEGFA      | 89% | 50µg         | LAM-PCR | 1        | 712,697          | 12,103         |
| <b>TOTAL</b> |                             |     | <b>150µg</b> |         | <b>3</b> | <b>2,748,159</b> | <b>28,451</b>  |
| #1           | Cas9:RAG1B +ATM TALEN       | 88% | 50µg         | LAM-PCR | 1        | 1,429,068        | 22,426         |
| #2           | Cas9:RAG1B +ATM TALEN       | 77% | 50µg         | LAM-PCR | 1        | 823,007          | 24,473         |
| #3           | Cas9:RAG1B +ATM TALEN       | 78% | 50µg         | LAM-PCR | 1        | 588,161          | 10,200         |
| <b>TOTAL</b> |                             |     | <b>150µg</b> |         | <b>3</b> | <b>2,840,236</b> | <b>57,099</b>  |
| #1           | Cas9:RAG1B +MYC TALEN       | 88% | 50µg         | LAM-PCR | 1        | 1,723,351        | 40,995         |
| #2           | Cas9:RAG1B +MYC TALEN       | 77% | 50µg         | LAM-PCR | 1        | 1,006,825        | 34,443         |
| #3           | Cas9:RAG1B +MYC TALEN       | 75% | 50µg         | LAM-PCR | 1        | 1,027,535        | 35,514         |
| <b>TOTAL</b> |                             |     | <b>150µg</b> |         | <b>3</b> | <b>3,757,711</b> | <b>110,952</b> |
| #1           | Cas9:RAG1C                  | 85% | 100µg        | EM-PCR  | 1        | 1,434,562        | 1,878          |
| #2           | Cas9:RAG1C                  | 51% | 100µg        | EM-PCR  | 1        | 1,238,636        | 1,512          |
| #3           | Cas9:RAG1C                  | 58% | 100µg        | EM-PCR  | 1        | 743,963          | 407            |
| #4           | Cas9:RAG1C                  | 89% | 100µg        | EM-PCR  | 1        | 814,688          | 644            |
| #5           | Cas9:RAG1C                  | 85% | 50µg         | LAM-PCR | 1        | 1,712,220        | 20,213         |
| #6           | Cas9:RAG1C                  | 85% | 50µg         | LAM-PCR | 1        | 1,920,004        | 25,046         |
| <b>TOTAL</b> |                             |     | <b>500µg</b> |         | <b>6</b> | <b>7,864,073</b> | <b>49,700</b>  |
| #1           | Cas9:RAG1D                  | 72% | 100µg        | EM-PCR  | 1        | 1,498,394        | 729            |
| #2           | Cas9:RAG1D                  | 56% | 100µg        | EM-PCR  | 1        | 1,458,917        | 784            |
| #3           | Cas9:RAG1D                  | 64% | 100µg        | EM-PCR  | 1        | 822,563          | 132            |
| #4           | Cas9:RAG1D                  | 89% | 100µg        | EM-PCR  | 1        | 825,052          | 184            |
| #5           | Cas9:RAG1D                  | 87% | 50µg         | LAM-PCR | 1        | 1,875,731        | 9,826          |
| #6           | Cas9:RAG1D                  | 87% | 50µg         | LAM-PCR | 1        | 1,595,863        | 9,516          |
| <b>TOTAL</b> |                             |     | <b>500µg</b> |         | <b>6</b> | <b>8,076,520</b> | <b>21,171</b>  |
| #1           | Cas9:RAG1B +ATM TALEN 100µg | 75% | 50µg         | LAM-PCR | 1        | 1,757,242        | 54,960         |
| #2           | Cas9:RAG1B +ATM TALEN 100µg | 77% | 50µg         | LAM-PCR | 1        | 1,685,816        | 63,678         |
| <b>TOTAL</b> |                             |     | <b>100µg</b> |         | <b>2</b> | <b>3,443,058</b> | <b>118,638</b> |
| #1           | Cas9:RAG1B +ATM TALEN 10µg  | 96% | 50µg         | LAM-PCR | 1        | 655,488          | 20,436         |
| #2           | Cas9:RAG1B +ATM TALEN 10µg  | 86% | 50µg         | LAM-PCR | 1        | 1,476,240        | 48,912         |
|              | Cas9:RAG1B +ATM TALEN 10µg  | 87% | 50µg         | LAM-PCR | 1        | 1,485,080        | 18,331         |
| <b>TOTAL</b> |                             |     | <b>150µg</b> |         | <b>3</b> | <b>3,626,808</b> | <b>87,679</b>  |
| #1           | Cas9:RAG1B +ATM TALEN 3µg   | 94% | 50µg         | LAM-PCR | 1        | 760,330          | 8,122          |
| #2           | Cas9:RAG1B +ATM TALEN 3µg   | 87% | 50µg         | LAM-PCR | 1        | 1,461,868        | 41,457         |
|              | Cas9:RAG1B +ATM TALEN 3µg   | 83% | 50µg         | LAM-PCR | 1        | 1,293,894        | 17,930         |
| <b>TOTAL</b> |                             |     | <b>150µg</b> |         | <b>3</b> | <b>3,516,092</b> | <b>67,509</b>  |

|              |                                 |     |                             |         |          |                  |               |
|--------------|---------------------------------|-----|-----------------------------|---------|----------|------------------|---------------|
| #1           | Cas9:RAG1B +ATM TALEN 1 $\mu$ g | 92% | 50 $\mu$ g                  | LAM-PCR | 1        | 678,188          | 7,418         |
| #2           | Cas9:RAG1B +ATM TALEN 1 $\mu$ g | 77% | 50 $\mu$ g                  | LAM-PCR | 1        | 1,399,326        | 24,120        |
| <b>TOTAL</b> |                                 |     | <b>100<math>\mu</math>g</b> |         | <b>2</b> | <b>2,077,514</b> | <b>31,538</b> |

#### Bait: Cas9 D10A nickase

| Exp          | Nuclease/Locus | GFP | Total DNA                   | Method  | Library  | Total Bait aligned | Filtered Junctions |
|--------------|----------------|-----|-----------------------------|---------|----------|--------------------|--------------------|
| #1           | Cas9n:RAG1A/G  | 86% | 100 $\mu$ g                 | EM-PCR  | 1        | 1,225,465          | 2,496              |
| #2           | Cas9n:RAG1A/G  | 88% | 100 $\mu$ g                 | EM-PCR  | 1        | 1,489,939          | 2,018              |
| #3           | Cas9n:RAG1A/G  | 86% | 100 $\mu$ g                 | EM-PCR  | 1        | 1,514,264          | 1,203              |
| #4           | Cas9n:RAG1A/G  | 91% | 50 $\mu$ g                  | LAM-PCR | 1        | 1,272,060          | 13,937             |
| #5           | Cas9n:RAG1A/G  | 90% | 50 $\mu$ g                  | LAM-PCR | 1        | 1,310,951          | 13,246             |
| #6           | Cas9n:RAG1A/G  | 92% | 50 $\mu$ g                  | LAM-PCR | 1        | 1,131,288          | 12,794             |
| <b>TOTAL</b> |                |     | <b>450<math>\mu</math>g</b> |         | <b>6</b> | <b>7,943,967</b>   | <b>45,694</b>      |

|              |               |     |                             |         |          |                  |               |
|--------------|---------------|-----|-----------------------------|---------|----------|------------------|---------------|
| #1           | Cas9n:RAG1A/E | 89% | 100 $\mu$ g                 | EM-PCR  | 1        | 1,409,177        | 3,826         |
| #2           | Cas9n:RAG1A/E | 86% | 50 $\mu$ g                  | LAM-PCR | 1        | 1,078,141        | 13,796        |
| <b>TOTAL</b> |               |     | <b>150<math>\mu</math>g</b> |         | <b>2</b> | <b>2,487,318</b> | <b>17,622</b> |

|              |              |     |                             |         |          |                  |               |
|--------------|--------------|-----|-----------------------------|---------|----------|------------------|---------------|
| #1           | Cas9:RAG1A/F | 87% | 100 $\mu$ g                 | EM-PCR  | 1        | 1,555,687        | 1,788         |
| #2           | Cas9:RAG1A/F | 87% | 50 $\mu$ g                  | LAM-PCR | 1        | 1,196,599        | 10,502        |
| <b>TOTAL</b> |              |     | <b>150<math>\mu</math>g</b> |         | <b>2</b> | <b>2,752,286</b> | <b>12,290</b> |

#### Bait: TALEN endonuclease

| Exp          | Nuclease/Locus | GFP | Total DNA                   | Method  | Library  | Total Bait aligned | Filtered Junctions |
|--------------|----------------|-----|-----------------------------|---------|----------|--------------------|--------------------|
| #1           | ATM TALEN      | 85% | 50 $\mu$ g                  | LAM-PCR | 1        | 1,629,352          | 22,844             |
| #2           | ATM TALEN      | 86% | 50 $\mu$ g                  | LAM-PCR | 1        | 440,065            | 10,760             |
| #3           | ATM TALEN      | 85% | 50 $\mu$ g                  | LAM-PCR | 1        | 1,058,993          | 35,553             |
| <b>TOTAL</b> |                |     | <b>150<math>\mu</math>g</b> |         | <b>3</b> | <b>3,128,410</b>   | <b>69,157</b>      |

|              |             |     |                             |         |          |                  |                |
|--------------|-------------|-----|-----------------------------|---------|----------|------------------|----------------|
| #1           | c-MYC TALEN | 87% | 50 $\mu$ g                  | LAM-PCR | 1        | 957,292          | 62,473         |
| #2           | c-MYC TALEN | 97% | 50 $\mu$ g                  | LAM-PCR | 1        | 1,043,966        | 24,886         |
| #3           | c-MYC TALEN | 95% | 50 $\mu$ g                  | LAM-PCR | 1        | 1,130,927        | 20,993         |
| <b>TOTAL</b> |             |     | <b>150<math>\mu</math>g</b> |         | <b>3</b> | <b>3,132,185</b> | <b>108,352</b> |

|              |                                     |     |                             |         |          |                  |               |
|--------------|-------------------------------------|-----|-----------------------------|---------|----------|------------------|---------------|
| #1           | ATM 1 $\mu$ g +C9B:RAG1B 20 $\mu$ g | 92% | 50 $\mu$ g                  | LAM-PCR | 1        | 1,288,833        | 2,227         |
| #2           | ATM 1 $\mu$ g +C9B:RAG1B 20 $\mu$ g | 81% | 50 $\mu$ g                  | LAM-PCR | 1        | 1,816,729        | 22,633        |
| #3           | ATM 1 $\mu$ g +C9B:RAG1B 20 $\mu$ g | 77% | 50 $\mu$ g                  | LAM-PCR | 1        | 1,659,566        | 15,185        |
| <b>TOTAL</b> |                                     |     | <b>150<math>\mu</math>g</b> |         | <b>3</b> | <b>4,765,128</b> | <b>40,045</b> |

|              |                                     |     |                             |         |          |                  |               |
|--------------|-------------------------------------|-----|-----------------------------|---------|----------|------------------|---------------|
| #1           | ATM 3 $\mu$ g +C9B:RAG1B 20 $\mu$ g | 94% | 50 $\mu$ g                  | LAM-PCR | 1        | 1,262,584        | 21,345        |
| #2           | ATM 3 $\mu$ g +C9B:RAG1B 20 $\mu$ g | 83% | 50 $\mu$ g                  | LAM-PCR | 1        | 1,580,141        | 28,890        |
| #3           | ATM 3 $\mu$ g +C9B:RAG1B 20 $\mu$ g | 87% | 50 $\mu$ g                  | LAM-PCR | 1        | 1,575,902        | 37,100        |
| <b>TOTAL</b> |                                     |     | <b>150<math>\mu</math>g</b> |         | <b>3</b> | <b>4,418,627</b> | <b>87,335</b> |

|              |                                      |     |                             |         |          |                  |                |
|--------------|--------------------------------------|-----|-----------------------------|---------|----------|------------------|----------------|
| #1           | ATM 10 $\mu$ g +C9B:RAG1B 20 $\mu$ g | 96% | 50 $\mu$ g                  | LAM-PCR | 1        | 1,104,338        | 25,359         |
| #2           | ATM 10 $\mu$ g +C9B:RAG1B 20 $\mu$ g | 87% | 50 $\mu$ g                  | LAM-PCR | 1        | 1,403,545        | 67,220         |
| #3           | ATM 10 $\mu$ g +C9B:RAG1B 20 $\mu$ g | 86% | 50 $\mu$ g                  | LAM-PCR | 1        | 1,463,665        | 59,393         |
| <b>TOTAL</b> |                                      |     | <b>150<math>\mu</math>g</b> |         | <b>3</b> | <b>3,971,548</b> | <b>151,972</b> |

**Supplementary Table 2. Estimated HTGTS background for various libraries**

| Target DNA                  | Vector control | Vector control | Cas9:RAG1A     | Cas9:RAG1B     | Cas9:RAG1C     | Cas9:RAG1D     |
|-----------------------------|----------------|----------------|----------------|----------------|----------------|----------------|
| <b>HTGTS cloning method</b> | EM-PCR RAG1A/B | EM-PCR RAG1C/D | EM-PCR RAG1A/B | EM-PCR RAG1A/B | EM-PCR RAG1C/D | EM-PCR RAG1C/D |
| <b>Input DNA</b>            | 100µg          | 100µg          | 100µg          | 100µg          | 100µg          | 100µg          |
| <b>Control DNA</b>          | NA             | NA             | Mouse          | Mouse          | Mouse          | Mouse          |
| <b>Target Junctions</b>     | 40             | 38             | 3,600          | 1,541          | 636            | 182            |
| <b>Control Junctions</b>    | -              | -              | 23             | 19             | 5              | 5              |
| <b>Background</b>           | <b>NA</b>      | <b>NA</b>      | <b>0.64%</b>   | <b>1.23%</b>   | <b>0.79%</b>   | <b>2.75%</b>   |

| Target DNA                  | Vector control  | Vector control  | Cas9:RAG1A      | Cas9:RAG1B      | Cas9:RAG1C      | Cas9:RAG1D      |
|-----------------------------|-----------------|-----------------|-----------------|-----------------|-----------------|-----------------|
| <b>HTGTS cloning method</b> | LAM-PCR RAG1A/B | LAM-PCR RAG1C/D | LAM-PCR RAG1A/B | LAM-PCR RAG1A/B | LAM-PCR RAG1C/D | LAM-PCR RAG1C/D |
| <b>Input DNA</b>            | 50µg            | 50µg            | 50µg            | 50µg            | 50µg            | 50µg            |
| <b>Control DNA</b>          | NA              | NA              | Mouse           | Mouse           | Mouse           | Mouse           |
| <b>Target Junctions</b>     | 2,346           | 134             | 26,508          | 16,516          | 20,247          | 7,500           |
| <b>Control Junctions</b>    | -               | -               | 191             | 113             | 206             | 94              |
| <b>Background</b>           | <b>NA</b>       | <b>NA</b>       | <b>0.72%</b>    | <b>0.68%</b>    | <b>1.02%</b>    | <b>1.25%</b>    |

**Supplementary Table 3. Cas9:RAG1A off-target site mismatches and translocations**

| Chromosome | Nuclease/Locus  | Off-target site sequence (NGG) | Mis-match | Cas9:RAG1A Frequency | Cas9n:RAG1A Frequency | OT1 Bait Freq. | OT2 Bait Freq. | OT17 Bait Freq. |
|------------|-----------------|--------------------------------|-----------|----------------------|-----------------------|----------------|----------------|-----------------|
| Chr11      | Cas9:RAG1A      | GCCTCTTCCCACCCACCTT            | GGGNNN    | 0                    | NA                    | 177.59         | 220.90         | 23.53           |
| Chr19      | DAZAP1 OT1      | ACCCCTTCCCACCTACCTT            | GGGTCG    | 4                    | 77.18***              | 0.18           | NA             | 89.65           |
| Chr12      | 47.0Mb OT2      | TCCTCTTCCCACCCACCTT            | CAGACT    | 4                    | 74.07***              | 0.26           | 121.84         | NA              |
| Chr7       | 155.9Mb OT3     | CCCTCTTCCCACCCACCTT            | GGGTGA    | 3                    | 40.46***              | 0.09           | 105.13         | 130.56          |
| Chr15      | SIN3A OT4       | TCCTCTTCCCACCCACCTC            | CGGCTC    | 3                    | 40.19***              | 0.20           | 137.20         | 174.13          |
| Chr11      | 94.9Mb OT5      | ACGTCTTCCCACCCACCTG            | GGGCCT    | 4                    | 24.84***              | -              | 7.33           | 19.21           |
| Chr14      | 78.5Mb OT6      | ACTTCTTCCCACCCACCTT            | CAGCCA    | 4                    | 23.98***              | 0.09           | 54.95          | 88.34           |
| Chr1       | CACHD1 OT7      | TCCTCTTCCCACCCACCTC            | TGGTTT    | 4                    | 22.62***              | -              | 33.59          | 63.81           |
| Chr17      | 6.8Mb OT8       | GTCTCTTCCCACCCACCTT            | GGGTG     | 3                    | 19.14***              | -              | 68.77          | 78.62           |
| Chr7       | TARP OT9        | CACCTTCCCACCCACCTT             | TGGATA    | 4                    | 17.57***              | -              | 23.86          | 29.82           |
| Chr7       | 112.9Mb OT10    | GCCTCTTCCCACCCACCTT            | GGGCC     | 3                    | 14.90***              | -              | 33.84          | 88.24           |
| Chr13      | RB1 OT11        | GCCTCTTACCACCTCACCT            | TGGGCA    | 5                    | 8.03                  | -              | 20.78          | 39.41           |
| Chr4       | RBPJ OT12       | TTCTCTTCCCACCCACCTT            | TGAGCT    | 4                    | 7.87                  | -              | 8.05           | 18.23           |
| Chr11      | 116.5Mb OT13    | TCCTCTTCCCACCCACCT             | AGGGTG    | 4                    | 7.69                  | -              | 11.99          | 6.36            |
| Chr20      | ATRN OT14       | GTCTCTTCCCACCCACCTT            | TGATAA    | 3                    | 6.01                  | -              | 12.18          | 20.92           |
| Chr11      | PCNXL3 OT15     | GCCCTTCCCACCCACCTG             | GGTGGA    | 5                    | 5.62                  | -              | 5.76           | 1.46            |
| Chr17      | FBXL20 OT16     | ACCTCTTATCCACCCACCTT           | GGCCTC    | 4                    | 4.49                  | 0.09           | 38.21          | 44.59           |
| Chr7       | 103.6Mb OT17    | GCCTCTTCCCACCCACCTT            | GGCTTG    | 7                    | 4.25                  | -              | 7.68           | 4.41            |
| Chr8       | 143.6Mb OT18    | ACCTCTTCCCACCCACCTG            | GGGCTC    | 4                    | 3.43                  | -              | 39.66          | 34.66           |
| Chr7       | AGK OT19        | ACCCCTTCCCACCTCACCTC           | CGGGAT    | 5                    | 3.12                  | -              | 0.69           | 1.95            |
| Chr12      | 103.2Mb OT20    | GCTTCTTCCCACCCACCT             | TGGTGG    | 4                    | 2.82                  | 0.1            | 3.90           | 26.07           |
| Chr1       | SLC35F3 OT21    | CACCTTCCCACCCACCTT             | GGGACC    | 5                    | 2.27                  | -              | 4.51           | 3.43            |
| Chr11      | 2.2Mb OT22      | GCCCTTCCCACCCACCTT             | GGGGGA    | 4                    | 1.95                  | -              | 4.19           | 10.35           |
| Chr22      | SUN2/DNAL3 OT23 | TGCTCTTCCCACCCACCCA            | AGGCCT    | 5                    | 1.82                  | -              | 8.13           | 4.42            |
| Chr1       | 33.6Mb OT24     | ACCTCTTCCCACCCACCTT            | GGGTCT    | 5                    | 1.54                  | -              | 1.37           | 0.73            |
| Chr14      | XRCC3 OT25      | GGCTCTTCCCACCCACCTC            | TGGGTC    | 5                    | 1.43                  | 0.09           | 11.80          | 3.43            |
| Chr17      | LOC284009 OT26  | GACTCTTCCCACCCACCTT            | AGGGGA    | 3                    | 1.40                  | -              | 24.14          | 14.50           |
| Chr3       | 0.4Mb OT27      | ACCTCTTCCCACCCACCTT            | TGGAGG    | 4                    | 1.33                  | -              | 0.69           | 1.72            |
| Chr4       | 181.5Mb OT28    | ACCTCTTCCCACCCACCTT            | GGGAAA    | 3                    | 1.14                  | -              | 2.67           | 1.72            |
| Chr6       | 40.0Mb OT29     | GTGTATTCCCACCCACCTT            | GGGAAG    | 4                    | 0.77                  | -              | -              | -               |
| Chr16      | FBXO31 OT30     | GCCCTTCCCACCCACCTT             | GTGGAA    | 4                    | 0.74                  | -              | 7.49           | 6.91            |
| Chr19      | CYTH2 OT31      | ACCTTGTCCCACCCACCTG            | GGGATC    | 6                    | 0.61                  | -              | 8.75           | 1.47            |
| Chr22      | CECR5 OT32      | GCCCTTACCACCTCCACCTT           | GGGTGC    | 4                    | 0.60                  | -              | 0.61           | 3.92            |
| Chr7       | VIPR2 OT33      | GCCCTTCCCACCCACCTG             | TGGAGC    | 4                    | 0.55                  | -              | 1.99           | 1.72            |

Mismatches to targeted Cas9:RAG1A and PAM are listed in red. Average junction frequencies (per 10,000 unique junctions) for off-target sites are listed for the Cas9:RAG1A (N=6) and the Cas9n:RAG1 combinations (total N=10; A/G (N=6), A/E (N=2), A/F (N=2)). Two-way ANOVA indicates an extremely significant interaction between Cas9:RAG1A and Cas9n:RAG1 A/G, A/E, A/F with the off-targets listed (p<0.0001). Post-tests indicate significance for each site (p<0.001 = \*\*\*). Additional Cas9:RAG1A OT bait site libraries with average on-target and OT junction frequencies also listed (N=3 each).



**Supplementary Table 4. ATM TALEN off-target site sequences**

| Chromosome | Nuclease/<br>Locus | Left half-site                                    | Spacer | Right half-site         | Mis-<br>match | RAG1B<br>Bait Freq. | ATM Bait<br>Freq. |
|------------|--------------------|---------------------------------------------------|--------|-------------------------|---------------|---------------------|-------------------|
| Chr11      | ATM<br>TALEN       | TGAATTGGGATGCTGTTT (+)                            | 18     | TTTATTTTACTGTCTTTA (+)  | NA            | 189.32              | NA                |
| Chr16      | HYDIN OT           | TGGATAGGGATGATGTGC (+)<br>TGAATAGAACTGCTTTTC (-)  | 17     | -                       | 5,7           | 43.83               | 61.03             |
| Chr1       | JAK1 OT            | TAAATAGGGATCTGAGC (+)<br>TGAATAGGGGTTTGATT (-)    | 15     | -                       | 6,5           | 43.25               | 100.42            |
| Chr21      | BRWD1-<br>AS1 OT   | TGAATAGGAACAAAGATT (+)<br>CGAATCGGGAAGATAATTC (-) | 14     | -                       | 7,6           | 38.43               | 31.99             |
| Chr15      | FRMD5 OT           | TCAATTGAAAAGCTGAGG (+)<br>CGAATAGGAATGCTCTGC (-)  | 17     | -                       | 7,6           | 17.88               | 27.53             |
| Chr21      | MIR5009<br>OT      | TGAATAGAAATGCTGTCA (+)<br>AAAATAGGGATGATTTTC (-)  | 14     | -                       | 5,5           | 14.52               | 11.22             |
| Chr10      | 65.5Mb OT          | TGGAATAGAAATGATGTAT (+)<br>TGAATGAGAATGCTCATT (-) | 18     | -                       | 7,5           | 12.48               | 15.25             |
| Chr6       | TSPYL4 OT          | TGAACAAGGATGCTGCAT (+)<br>TCACTTAAAAACTGTTT (-)   | 18     | -                       | 5,6           | 12.32               | 26.15             |
| Chr3       | 176.1Mb OT         | TAGATAGTGACTGTTT (+)<br>TAAATAGTGATGCTGTGG (-)    | 15     | -                       | 5,5           | 11.75               | 19.26             |
| Chr9       | 7.7Mb OT           | TAAATAGGAAGCTGAGG (+)<br>TGAATCAGGAACCTGTCC (-)   | 23     | -                       | 6,6           | 12.25               | 13.29             |
| Chr9       | 13.4Mb OT          | TGACTTCAGATGCTGCCT (+)<br>TGAATTGGAAGCAGTAG (-)   | 15     | -                       | 5,5           | 10.17               | 14.19             |
| Chr15      | 37.9Mb OT          | TGGACTAGAGTGCTGGTT (+)<br>TTAGTTGGGATACTGCTT (-)  | 18     | -                       | 5,4           | 8.25                | 14.38             |
| Chr1       | 22.9Mb OT          | GGAATCAGGATACTCCTC (+)<br>TGGATTAGAAATGATCTAC (-) | 17     | -                       | 7,7           | 7.70                | 11.68             |
| Chr1       | 180.0Mb OT         | TGAATGGAGATGATTACA (+)<br>TGAATAGGCACGCTGTTC (-)  | 16     | -                       | 7,4           | 8.18                | 15.30             |
| Chr6       | LRFN2 OT           | TGATTTGAGATGCTCTTA (+)<br>TGCATAGGGGAGATGTTT (-)  | 14     | -                       | 4,5           | 6.10                | 12.37             |
| Chr6       | 160.5Mb OT         | TGAAGCAGGATACTGCAT (+)<br>TGCATAAAGATGCTATTG (-)  | 18     | -                       | 6,6           | 6.49                | 12.42             |
| Chr2       | 40.0Mb OT          | TGCATAGTGAAGCTGCTT (+)<br>TGAATAGGGAACCTATAG (-)  | 17     | -                       | 5,6           | 6.53                | 7.65              |
| Chr15      | FBN1 OT            | TGAGTGAGGGTTCTAGTT (-)                            | 16     | ACTATTTTACTGTCTTTTC (-) | 7,3           | 6.08                | 3.11              |
| Chr13      | PCDH9 OT           | TGAGATGAGAGACTCACT (+)<br>TGAATTAAAGATACTGTTT (-) | 16     | -                       | 8,3           | 6.37                | 4.28              |
| Chr18      | 20.3Mb OT          | TGCATGAAAAACTATCT (+)<br>TAAATAAGAAAGCTTTCT (-)   | 17     | -                       | 7,7           | 6.41                | 4.24              |
| Chr14      | GMFB OT            | TGAAAGGAAATACTGTCT (+)<br>TGAAATAGGATATTATAT (-)  | 15     | -                       | 6,6           | 4.82                | 4.72              |
| Chr2       | 55.8Mb OT          | TAAATGAAAGGCTGTGG (+)<br>GGCATTGCGTTGAATTGT (-)   | 17     | -                       | 5,8           | 4.63                | 3.87              |
| Chr10      | SH3PXD2A<br>OT     | GGAATGGAAACCTGTTT (+)<br>TGAAATGAGATGATTTAT (-)   | 13     | -                       | 5,5           | 6.28                | 18.27             |
| Chr12      | MLXIP OT           | TGAAGTGGGGTGCTGCCT (+)<br>TTGATTGGGATTAATGTTT (-) | 17     | -                       | 4,4           | 5.24                | 8.65              |
| Chr19      | ZNF814 OT          | TGAATGAGGCTGCTCTTT (+)<br>TGAATGTGGAGAATGTGG (-)  | 15     | -                       | 4,7           | 4.93                | 8.47              |
| Chr3       | WNT7A OT           | TGAACAAGGATGCTTTGT (+)<br>TAAATGAGATATGCTT (-)    | 15     | -                       | 4,5           | 3.71                | 7.96              |
| Chr12      | FBXO21 OT          | TACATTAGAAATGATGTCC (+)<br>TGAATGTAATGCTAATG (-)  | 17     | -                       | 7,6           | 4.26                | 4.31              |
| Chr15      | TCF12 OT           | TTAATTGGGACCTGCCT (+)<br>TGCATCTGGCTAATGTTT (-)   | 17     | -                       | 5,6           | 4.50                | 5.06              |
| Chr22      | PI4KA OT           | TAAATGAAGCAACTGTTT (+)                            | 18     | GACACTCTACTGTCTTCA (+)  | 7,6           | 4.41                | 5.21              |
| Chr7       | ABCB1 OT           | TGAATATGTATACTGCTT (+)<br>TGAATGGAAAGACTATTG (-)  | 21     | -                       | 5,5           | 4.50                | 7.10              |
| Chr15      | 82.1Mb OT          | AGAATGCTGTGCTCTTT (+)<br>CCAATGGGGAAGATGTTT (-)   | 16     | -                       | 6,6           | 3.97                | 6.49              |

Left and Right TALEN half-sites are reported in the same chromosomal orientation except for loci displaying the same half-site for both sides with the 2<sup>nd</sup> site reported in the (-) orientation. Average frequencies (per 10,000) are listed for RAG1B and ATM bait libraries.

**Supplementary Table 5. C-MYC TALEN off-target site sequences**

| Chromosome | Nuclease/<br>Locus | Left half-site                                   | Spacer | Right half-site                                  | Mismatch | RAG1B<br>Bait Freq. | C-MYC<br>Bait Freq. |
|------------|--------------------|--------------------------------------------------|--------|--------------------------------------------------|----------|---------------------|---------------------|
| Chr8       | C-MYC<br>TALEN     | TGCTTAGACGCTGGATTT (+)                           | 16     | AACCAGGTAAGCACCGAA (+)                           | NA       | 26.10               | NA                  |
| Chr19      | TIMM44 OT          | TACTTAGAACCTGGGTTT (-)                           | 18     | GGCCAGGGTGGCATCTGA (-)                           | 5,8      | 17.23               | 25.11               |
| Chr11      | CUL5 OT            | -                                                | 16     | TATTAGTTAAGTACTTGT (+)<br>CCACAGGTAAGTACTTAA (-) | 9,6      | 23.12               | 3.60                |
| Chr3       | SEMA5b OT          | -                                                | 20     | ACCCAGGCACACACAGAA (+)<br>CCTCAGGTATGCATTGAA (-) | 5,6      | 9.23                | 13.27               |
| Chr14      | SLC35F4<br>OT      | TACTCAGAAAATGAATTA (-)                           | 17     | AACCAGGTAACTTTTGT (-)                            | 7,5      | 8.41                | 22.76               |
| Chr19      | 4.5Mb OT           | -                                                | 22     | TTACAGGAGTGCCTGCC (+)<br>AACACGAGAAATCGCTTGA (-) | 9,8      | 8.07                | 20.79               |
| Chr21      | 25.3Mb OT          | TCCCGAGAGCTGGAATT (-)                            | 18     | AACCAGGTAAATTTTGT (-)                            | 5,6      | 4.52                | 2.40                |
| Chr8       | 1.6Mb OT           | TGATTAAACCTGATTC (+)<br>TCCTTGAACACTGGCTTT (-)   | 16     | -                                                | 7,5      | 5.34                | 33.84               |
| Chr1       | PHC2 OT            | -                                                | 15     | AAGCAGGTAAGGACCTTA (+)<br>AACCAGGGAAGTATCCAA (-) | 4,4      | 4.01                | 6.26                |
| Chr3       | CCDC14<br>OT       | -                                                | 15     | GATCAGGTAGGCATTC (+)<br>AGTCAGGTAAGCACACCA (-)   | 6,5      | 6.90                | 5.84                |
| Chr8       | LRRC69 OT          | TCCCAAGAAGCTGGGATT (-)                           | 18     | AACCAGGTAAATTTTGT (-)                            | 6,7      | 5.81                | 66.63               |
| Chr5       | RhoBTB3<br>OT      | -                                                | 18     | CATCTGGTGAGTGCTGAA (+)<br>AATGAGGCAGGCACATA (-)  | 7,6      | 4.34                | 3.09                |
| Chr13      | 39.6Mb OT          | TACTAAAAGCAAGGTTT (-)                            | 17     | AACCAGGTAGGGAATAT (-)                            | 8,5      | 3.09                | 7.99                |
| Chr4       | 43.3Mb OT          | -                                                | 10     | ATGCTTGTAATCCAGCA (+)<br>AACCAGGTACTTTCTTAA (-)  | 7,5      | 3.78                | 4.04                |
| Chr17      | 14.6Mb OT          | TACTCATGAGCTAAATAT (-)                           | 17     | TACCAGGTATGCTTGTGAA (-)                          | 8,6      | 4.29                | 5.72                |
| Chr13      | 74.7Mb OT          | -                                                | 17     | GCCCAAGTAAGCATCCAA (+)<br>GCGCAGGTAAGCATCTAA (-) | 5,5      | 3.71                | 6.58                |
| Chr3       | 165.2Mb OT         | TGCTAAGAAGCTGGACTC (+)<br>TGCTTAGAAGCAGGCTTT (-) | 15     | -                                                | 4,4      | 3.56                | 14.73               |
| Chr10      | FAM171A<br>OT      | TACATAAAGCAAGATTC (+)                            | 17     | GGGAAGGTAAACATTGAA (+)                           | 7,7      | 3.09                | 5.43                |
| Chr8       | PBK OT             | TAATAAGACACAAGATAC (+)<br>TGCTTCTCTGCTGAATTA (-) | 16     | -                                                | 8,6      | 4.07                | 31.67               |
| Chr5       | 108.7Mb OT         | TAAATAGAGAAGGCTTG (+)<br>TGATTAGAACATAGATCC (-)  | 14     | -                                                | 8,7      | 3.42                | 11.77               |
| Chr5       | SH3PXD2B<br>OT     | TCCATAGACACTGCATCT (+)                           | 16     | AACCAGTCAAGCACTTTT (+)                           | 5,6      | 3.19                | 10.95               |
| Chr10      | 101.5Mb OT         | TCCTGAGTAGCTGGATTA (+)                           | 17     | GCCAGGTAATTTTGT (+)                              | 5,8      | 3.64                | 5.83                |
| Chr18      | SS18 OT            | TACCTAGAAAAGAAATGT (-)                           | 17     | CAGCAGTATGCCTGGA (-)                             | 8,7      | 3.64                | 3.60                |
| Chr21      | 30.3Mb OT          | TGTATAGAGCTGGGTGT (+)<br>TCCCAAGCACTAGGATT (-)   | 16     | -                                                | 5,9      | 3.12                | 4.58                |
| Chr3       | FAM208A<br>OT      | TAATGAAGCCCTGAACAT (+)                           | 13     | GTCCAGTTAAGCTCTTTA (-)                           | 9,7      | 3.73                | 13.00               |
| Chr10      | DNA2 OT            | TCCCAAGAAGCTGGGTTT (-)                           | 18     | ACCAGCTAAATTTTGT (-)                             | 5,8      | 2.82                | 3.76                |
| Chr3       | MRPS22<br>OT       | TAATGAAGCCCTGAACAT (+)                           | 14     | GTCCAGTTAAGCTCTTTA (+)                           | 9,7      | 2.63                | 4.55                |
| Chr17      | 69.9Mb OT          | -                                                | 22     | AATATGGTAAACTTTGAA (+)<br>AATCAGGTAAGTATTTCA (-) | 7,6      | 4.21                | 4.66                |
| ChrX       | PGK1 OT            | TGCTTAAAAAAGAATAT (+)<br>TACCTAGAGCTGATGGA (-)   | 16     | -                                                | 7,8      | 2.96                | 14.29               |
| ChrX       | 122.9Mb OT         | TGCTTTGGCCCTGTGAGT (-)                           | 21     | GAGATAGGAAGCACTTAA (-)                           | 7,8      | 2.85                | 5.19                |
| Chr17      | HS3ST3A1<br>OT     | TCTCGAGAAGCTGAAATT (+)                           | 20     | GCCAGGTAATTTTGT (+)                              | 6,8      | 3.37                | 4.85                |

Left and Right TALEN half-sites are reported in the same chromosomal orientation except for loci displaying the same half-site for both sides with the 2<sup>nd</sup> site reported in the (-) orientation. Average frequencies (per 10,000) are listed for RAG1B and C-MYC bait libraries.

**Supplementary Table 6. Cas9:RAG1B and I-SceI off-target site mismatches and translocations**

| Bait              | Chromosome   | Nuclease/Locus    | Off-target site sequence                     | Mismatch | Frequency (per 10,000) |
|-------------------|--------------|-------------------|----------------------------------------------|----------|------------------------|
| <b>Cas9:RAG1B</b> | <b>Chr11</b> | <b>Cas9:RAG1B</b> | <b>GACTTGTGTTTCATTGTTCTC AGGNNN</b>          | <b>0</b> | <b>NA</b>              |
| "                 | Chr14        | ZC3H14 OT1        | TCC <b>T</b> GTTTTCATTGTTCTC TGGTGG          | 2        | 289.64                 |
| "                 | Chr4         | 120.5Mb OT2       | CAT <b>T</b> GTTTTCATTGTTCTC TGGCTG          | 2        | 37.42                  |
| <b>Cas9:RAG1B</b> | <b>NA</b>    | <b>I-SceI</b>     | <b>NNN TAGGGATAACAGGGTAAT NNN</b>            | <b>0</b> | <b>NA</b>              |
| "                 | Chr11        | 18.7Mb OT1        | GTC T <b>T</b> GGGATAACAGGG <b>C</b> AA GCA  | 3        | 28.85                  |
| "                 | Chr8         | 31.4Mb OT2        | ATT T <b>T</b> GGGATAACAGGG <b>C</b> AAT ACT | 2        | 8.45                   |
| "                 | Chr11        | 29.5Mb OT3*       | TTG TAGGGATA <b>C</b> CAGG <b>T</b> TAT TTC  | 3        | 6.97                   |
| "                 | Chr1         | CACNA1E OT4       | GGC TAGGGATA <b>C</b> CAGG <b>T</b> CAA CAA  | 4        | 5.20                   |
| "                 | Chr11        | GLYAT OT5         | CAC TAGGGATAACAGG <b>C</b> TAT CGG           | 2        | 5.17                   |
| "                 | Chr20        | 11.4Mb OT6        | TAC TAGGGATA <b>C</b> CAGGG <b>T</b> CAT TCA | 2        | 4.86                   |
| "                 | Chr9         | 24.8Mb OT7        | TGC TAGGGATAACAGG <b>T</b> GAA GGT           | 3        | 3.64                   |
| "                 | Chr6         | CCND3 OT8         | CAG TAGGGATAACAGGG <b>C</b> TGT TGA          | 3        | 3.54                   |
| "                 | Chr2         | 119.9Mb OT9       | CAC TAGGGAT <b>C</b> CAGGG <b>T</b> GAA CAA  | 4        | 1.4                    |

Mismatches to target sequences are listed in red. Average frequencies are listed (Cas9:RAG1B N=6; I-SceI N=3). Asterisk (\*) indicates locus with 2 identical off-target sequences.

**Supplementary Table 7. Cas9:EMX1 and Cas9:VEGFA off-target site mismatches and translocations**

| Bait              | Chromosome  | Nuclease/Locus    | Off-target site sequence                              | Mismatch | Frequency (per 10,000) |
|-------------------|-------------|-------------------|-------------------------------------------------------|----------|------------------------|
| <b>Cas9:RAG1B</b> | <b>Chr2</b> | <b>Cas9:EMX1</b>  | <b>GAGTCCGAGCAGAAGAAGAA GGGNNN</b>                    | <b>0</b> | <b>136.25</b>          |
| "                 | Chr15       | MFAP1 OT1         | GAGTCT <b>TA</b> AGCAGAAGAAGAA <b>GAGAGC</b>          | 3        | 189.39                 |
| "                 | Chr5        | HCN1 OT2**        | GAGT <b>TAG</b> AGCAGAAGAAGAA AGGCAT                  | 2        | 120.13                 |
| "                 | Chr5        | SEMA5A OT3        | <b>AAGTCTG</b> AGCACAAGAAGAA TGGTGA                   | 3        | 46.42                  |
| "                 | Chr2        | 219.8Mb OT4       | GAGGCCGAGCAGAAGA <b>AGA</b> CGGCGA                    | 3        | 30.31                  |
| "                 | Chr11       | HSD17B12 OT5      | <b>AAGTCCG</b> AGCA <b>AAG</b> GAAGAA AGGAGA          | 4        | 28.48                  |
| "                 | Chr8        | 128.8Mb OT6       | GAGTCT <b>AGCAG</b> GAGAAGAA <b>GAGGCA</b>            | 3        | 16.35                  |
| "                 | ChrX        | 53.4Mb OT7        | GAGTCC <b>GG</b> A <b>G</b> GAGAAGAA AGGCTC           | 3        | 8.11                   |
| "                 | Chr5        | DPYSL3 OT8        | GAGCC <b>GG</b> AGCAGAAGA <b>AGGA</b> GGGAGG          | 3        | 6.21                   |
| "                 | Chr11       | MTA2 OT9          | <b>GAATCC</b> AAGCAGAAGA <b>AGAG</b> <b>AAGGAG</b>    | 4        | 5.95                   |
| "                 | Chr6        | WASF1 OT10        | <b>AAGTCA</b> GAGCAGAA <b>AAAGAG</b> AGGACA           | 4        | 5.41                   |
| "                 | Chr6        | 9.1Mb OT11        | <b>ACGTCTG</b> AGCAGAAGAAGAA TGGACA                   | 3        | 1.34                   |
| "                 | Chr1        | TCEA3 OT12        | <b>AAGTCCG</b> AG <b>AGG</b> GAAGAA AGGGTT            | 3        | 1.14                   |
| "                 | Chr13       | 27.7Mb OT13       | GAGT <b>AGG</b> AGCAG <b>G</b> GAGAAGAA <b>GGAGGA</b> | 4        | 1.08                   |
| <b>Cas9:RAG1B</b> | <b>Chr6</b> | <b>Cas9:VEGFA</b> | <b>GGGTGGGGGAGTTTGCTCC TGGNNN</b>                     | <b>0</b> | <b>190.26</b>          |
| "                 | Chr15       | IGDCC3 OT1**      | GG <b>AT</b> TGGAGGGAGTTTGCTCC TGGGGT                 | 2        | 176.22                 |
| "                 | Chr17       | KRT42P OT2        | <b>TAGTGG</b> AGGGAG <b>CT</b> TGCTCC TGGCTG          | 4        | 165.88                 |
| "                 | Chr1        | 99.3Mb OT3**      | <b>GGGGAGGGGA</b> AGTTTGCTCC TGGCAT                   | 3        | 136.19                 |
| "                 | Chr12       | LINC01257 OT4**   | GGG <b>AGGGT</b> GGAG <b>TTT</b> GCTCC TGGGGA         | 3        | 72.27                  |
| "                 | Chr12       | CACNA2D4 OT5**    | <b>CGGGGGA</b> AGGGAGTTTGCTCC TGGGGA                  | 3        | 66.03                  |
| "                 | Chr22       | PVALB OT6         | GGGTGGGGGAGTTTG <b>CCC</b> AGGCCA                     | 1        | 49.04                  |
| "                 | Chr6        | 14.3Mb OT7        | <b>GTGGGGT</b> AGAGTTTGCTCC AGGTGT                    | 4        | 38.70                  |
| "                 | Chr22       | 19.6Mb OT8        | <b>GAGGGGAGC</b> AGTTTGCTCC AGGTGA                    | 4        | 33.47                  |
| "                 | Chr5        | 32.9Mb OT9        | <b>GCGTGGGGGT</b> GTTTGCTCC CGGGCA                    | 2        | 19.33                  |
| "                 | Chr17       | 47.3Mb OT10       | <b>CTGGT</b> GGGGGAG <b>CT</b> TGCTCC AGGGAA          | 5        | 18.04                  |
| "                 | Chr11       | 67.5Mb OT11       | <b>AGGAAGG</b> AGGAGTT <b>AGCTCC</b> TGGGGG           | 5        | 16.66                  |
| "                 | Chr5        | MAP3K1 OT12       | GG <b>TGGGGT</b> GGTTTGCTCC TGGTAT                    | 4        | 15.86                  |
| "                 | Chr11       | DSCAML1 OT13      | GGG <b>CA</b> AGGGAG <b>GTT</b> GCTCC TGGAGA          | 4        | 15.63                  |
| "                 | Chr3        | 128.2Mb OT14      | <b>AGGTGGT</b> GGGAG <b>CTTGT</b> TCC TGGCTT          | 4        | 15.12                  |
| "                 | Chr1        | PCNXL2 OT15       | GG <b>AGG</b> AGGGAG <b>CT</b> GTCTCC AGGTTT          | 4        | 14.02                  |
| "                 | Chr11       | KIAA1549L OT16    | <b>AGCTAG</b> GGGAG <b>CTT</b> GCTCT <b>GGGCTG</b>    | 5        | 12.31                  |
| "                 | Chr4        | TRMT44 OT17       | <b>GAGTGGG</b> TGGAGTTTG <b>CTAC</b> AGGCAG           | 3        | 12.12                  |
| "                 | Chr13       | ATP8A2 OT18       | GG <b>TTG</b> AGGGGAG <b>CT</b> GCTCC AGGCTT          | 3        | 11.80                  |
| "                 | Chr1        | TRIM62 OT19       | GGGTGGG <b>TGG</b> AGTTTG <b>CTAC</b> TGGCAT          | 2        | 10.41                  |
| "                 | Chr20       | 56.1Mb OT20       | <b>AGGGAGG</b> AGGA <b>ATT</b> TGCTCC AGGAGT          | 5        | 9.96                   |
| "                 | Chr17       | 32.9Mb OT21       | GGGG <b>TGGGG</b> A <b>CTT</b> TGCTCC AGGGCC          | 3        | 8.65                   |
| "                 | Chr22       | SUN2 OT22         | GGG <b>CA</b> GAGGGAG <b>TTAG</b> CACC GGGCGT         | 5        | 7.95                   |
| "                 | Chr16       | 8.7Mb OT23        | <b>AAGTA</b> AGGG <b>A</b> AGTTTGCTCC TGGTCC          | 5        | 6.11                   |
| "                 | Chr11       | 3.4Mb OT24        | <b>AGGAAGG</b> AGGAGTT <b>AGCTCC</b> TGGGGG           | 5        | 5.69                   |
| "                 | Chr11       | 71.4Mb OT25       | <b>AGGAAGG</b> AGGAGTT <b>AGCTCC</b> TGGGGG           | 5        | 5.52                   |
| "                 | Chr10       | 124.7Mb OT26      | <b>AGCTGG</b> AGGGAGTT <b>GGCCC</b> AGGTGA            | 4        | 5.03                   |
| "                 | Chr5        | 7.0Mb OT27        | <b>GAGGGT</b> GGGGAGTT <b>ACTCC</b> TGGAGG            | 4        | 4.72                   |
| "                 | Chr20       | C20orf62 OT28     | GGGT <b>AGGGGA</b> <b>ATAA</b> CTCC AGGGTG            | 5        | 3.80                   |
| "                 | Chr22       | 38.2Mb OT29       | <b>AGGT</b> CGGGGAGTT <b>AGATCC</b> CGGGGT            | 4        | 3.66                   |
| "                 | Chr11       | 47.2Mb OT30       | GGGG <b>AGGGG</b> AG <b>GGT</b> GCTCC AGGCAG          | 3        | 3.47                   |
| "                 | ChrX        | 19.1Mb OT31       | GGG <b>AGGGG</b> AGAGTT <b>GT</b> TCC AGGAAA          | 3        | 3.38                   |
| "                 | Chr21       | RUNX1 OT32        | <b>AAGTGGG</b> AAGAGTT <b>GT</b> TCC AGGCTC           | 5        | 2.96                   |
| "                 | Chr12       | C12orf39 OT33     | GGG <b>AGGGG</b> CA <b>AGTT</b> GCTCC AGGATA          | 3        | 2.58                   |
| "                 | Chr11       | NAV2 OT34         | <b>AGGTAGG</b> AG <b>AAGCTT</b> GCTCC TGAGAT          | 6        | 2.45                   |
| "                 | Chr3        | LINC00885 OT35    | GG <b>TGGGG</b> AG <b>AGCTA</b> GCTCC GGGAGG          | 5        | 2.41                   |
| "                 | Chr8        | 28.4Mb OT36       | <b>AAGTGGG</b> AGGAG <b>ACT</b> GCTCC AGGTAG          | 5        | 1.80                   |
| "                 | Chr10       | 6.7Mb OT37        | <b>AAATGGGGG</b> AGTT <b>GC</b> CCC <b>CCGGAG</b>     | 5        | 1.52                   |
| "                 | Chr19       | 18.5Mb OT38       | GGGG <b>CGGGG</b> AG <b>TTGC</b> CCC GGGGAA           | 4        | 1.52                   |

Mismatches to target sequences are listed in RED. Average frequencies are listed (Cas9:EMX1 N=3; Cas9:VEGFA N=3). Double Asterisks (\*\*) represent sites previously identified<sup>15</sup>.

**Supplementary Table 8. Translocation cloning and off-target oligos**

| Name                                 | Sequence5'→3' **                                                                 | Purpose                                               |
|--------------------------------------|----------------------------------------------------------------------------------|-------------------------------------------------------|
| <b>I-SceI off-target (OT) oligos</b> |                                                                                  |                                                       |
| Chr11_18.7Mb_F                       | AGC CCC GTC TTC TCT GAA TG                                                       | 1kb amplicon; OT site<br>800bp / 200bp                |
| Chr11_18.7Mb_R                       | CGT TGA GCT GCT TTT TCC TC                                                       |                                                       |
| Chr8_31.4Mb_F                        | GCA ACA CGG TGT GGT ATT TC                                                       | 980bp amplicon OT site<br>600bp / 380bp               |
| Chr8_31.4Mb_R                        | TGA ACC AAT CCT GAC ATT GC                                                       |                                                       |
| Chr11_29.5Mb_F                       | TTT GGA AAC AAG CCC AGT TG                                                       | 1,419bp amplicon; 2 OT<br>sites 250bp / 800bp / 350bp |
| Chr11_29.5Mb_R                       | TGA CCC CAG ATT CCT TCT TC                                                       |                                                       |
| CACNA1E_F                            | GGT GGT TCC TGA GTG TTT CC                                                       | 995bp amplicon; OT site<br>300bp / 695bp              |
| CACNA1E_R                            | TGG CCA AAA GTC ATG AAG TG                                                       |                                                       |
| Chr20_11.4Mb_F                       | GGT TGC CAT TGT GAT TCC TC                                                       | 1kb amplicon; OT site<br>700bp / 300bp                |
| Chr20_11.4Mb_R                       | GGC ATA AAC CCA CAA AAA GG                                                       |                                                       |
| GLYAT_F                              | CCT TAG CCC ATG GAT TCT ACC                                                      | 964bp amplicon; OT site<br>220bp / 744bp              |
| GLYAT_R                              | TCA GTT TAC CCC AAC CAA GC                                                       |                                                       |
| Chr2_119.9Mb_F                       | TGC TGT GGC TTG AAT GTC TC                                                       | 900bp amplicon; OT site<br>800bp / 100bp              |
| Chr2_119.9Mb_R                       | ACT TCT GAG GGG CCT TTG TC                                                       |                                                       |
| <b>Oligos for T7 Endo I</b>          |                                                                                  |                                                       |
| RAG1_F                               | CCC CCT GGA AGA CTG CTT TA                                                       | 690bp amplicon; 470bp /<br>220bp Cas9:RAG1B site      |
| RAG1_R                               | AGG ACT GCT GGA GAT TGC TC                                                       |                                                       |
| RAG1B_OT1_F                          | TTG GTT GCC CAT CTT ATT CC                                                       | 700bp amplicon; OT site<br>220bp / 480bp              |
| RAG1B_OT1_R                          | AGC TAA ACC TGC CTG CAG AA                                                       |                                                       |
| RAG1B_OT2_F                          | AAT AAC TTG CAG CCA TTC CA                                                       | 700bp amplicon; OT site<br>180bp / 520bp              |
| RAG1B_OT2_R                          | TAA ATT GCC CAT GAT TGC AC                                                       |                                                       |
| <b>EM-PCR adapter oligos</b>         |                                                                                  |                                                       |
| Universal oligo                      | /5phos/ TAA CCA GCC C /3InvdT/                                                   | Suppress adapter-ended<br>amplification               |
| Priming oligo                        | GTA ATA CGA CTC ACT ATA GGG CAC GCG TGG TCG<br>ACG GCC CCG GCT GGT TAT           | Contains adapter primer                               |
| <b>RAG1 A/B</b>                      |                                                                                  |                                                       |
| Bio RAG1A/B - F1                     | /5BiosG/ AGG ACT GCT GGA GAT TGC TC                                              | Bio-PCR1                                              |
| RAG1A/B - F2 I5 M00B                 | TAC ACT CTT TCC CTA CAC GAC GCT CTT CCG ATC<br>TGA GAG GGT TTC CCC TCA AAG       | Miseq tail                                            |
| RAG1A/B - F2 I5 M02B                 | TAC ACT CTT TCC CTA CAC GAC GCT CTT CCG ATC<br>TTG GAG AGG GTT TCC CCT CAA AG    | Miseq tail multiplex                                  |
| RAG1A/B - F2 I5 M03B                 | TAC ACT CTT TCC CTA CAC GAC GCT CTT CCG ATC<br>TCA TGA GAG GGT TTC CCC TCA AAG   | Miseq tail multiplex                                  |
| RAG1A/B - F2 I5 M04B                 | TAC ACT CTT TCC CTA CAC GAC GCT CTT CCG ATC<br>TGC TCG AGA GGG TTT CCC CTC AAA G | Miseq tail multiplex                                  |

|                                        |                                                                                          |                                               |
|----------------------------------------|------------------------------------------------------------------------------------------|-----------------------------------------------|
| RAG1A/B - F2 I5 M05B                   | TAC ACT CTT TCC CTA CAC GAC GCT CTT CCG ATC<br>TGC CAT GAG AGG GTT TCC CCT CAA AG        | Miseq tail multiplex                          |
| RAG1A/B - F2 I5 M06B                   | TAC ACT CTT TCC CTA CAC GAC GCT CTT CCG ATC<br>TAT ATC GGA GAG GGT TTC CCC TCA AAG       | Miseq tail multiplex                          |
| AP2 I7                                 | TCT CGG CAT TCC TGC TGA ACC GCT CTT CCG ATC<br>TAC TAT AGG GCA CGC GTG GT                | Adapter primer; Miseq tail reverse complement |
| P5                                     | AAT GAT ACG GCG ACC ACC GAG ATC TAC ACT CTT<br>TCC CTA CAC GAC GCT                       | Miseq tail PCRIII                             |
| P7                                     | CAA GCA GAA GAC GGC ATA CGA GAT CGG TCT CGG<br>CAT TCC TGC TGA ACC                       | Miseq tail PCRIII reverse complement          |
| <b>RAG1 C/D</b>                        |                                                                                          |                                               |
| Bio RAG1C/D - F1                       | /5BiosG/ CCT GAG AAC AAT GAA AAC AAG TC                                                  | Bio-PCR1                                      |
| RAG1C/D - F2 I5 M00C                   | TAC ACT CTT TCC CTA CAC GAC GCT CTT CCG ATC<br>TAC CAA TAT CAA TAT CCC ACT GAT G         | Miseq tail                                    |
| RAG1C/D - F2 I5 M02C                   | TAC ACT CTT TCC CTA CAC GAC GCT CTT CCG ATC<br>TCG ACC AAT ATC AAT ATC CCA CTG ATG       | Miseq tail multiplex                          |
| RAG1C/D - F2 I5 M04C                   | TAC ACT CTT TCC CTA CAC GAC GCT CTT CCG ATC<br>TCA CGA CCA ATA TCA ATA TCC CAC TGA TG    | Miseq tail multiplex                          |
| RAG1C/D - F2 I5 M06C                   | TAC ACT CTT TCC CTA CAC GAC GCT CTT CCG ATC<br>TGA CTC GAC CAA TAT CAA TAT CCC ACT GAT G | Miseq tail multiplex                          |
| <b>Bridge adapter oligos (LAM-PCR)</b> |                                                                                          |                                               |
| ssA-upper-TN                           | GCG ACT ATA GGG CAC GCG TGG TNN NNN-/3AmMO/                                              | Common bridge oligo                           |
| ssA-lower                              | /5Phos/ CCA CGC GTG CCC TAT AGT CGC-/3AmMO/                                              | To link A-tailed DNA                          |
| ssA-lower-A                            | /5Phos/ ACC ACG CGT GCC CTA TAG TCG C-<br>/3AmMO/                                        | To link G-,C-, T-tailed or blunt DNA          |
| <b>Cas9:RAG1A – OT</b>                 |                                                                                          |                                               |
| Bio DAZAP - F1A                        | /5BiosG/ TTC CCT GTA ACT TGG GAT GG                                                      | Bio-PCR1                                      |
| DAZAP - F2A I5 M00F                    | TAC ACT CTT TCC CTA CAC GAC GCT CTT CCG ATC<br>TTG CCC AGA AAT CAG AAC AAC               | Miseq tail                                    |
| DAZAP - F2A I5 M02F                    | TAC ACT CTT TCC CTA CAC GAC GCT CTT CCG ATC<br>TAG TGC CCA GAA ATC AGA ACA AC            | Miseq tail multiplex                          |
| DAZAP - F2A I5 M03F                    | TAC ACT CTT TCC CTA CAC GAC GCT CTT CCG ATC<br>TTC ATG CCC AGA AAT CAG AAC AAC           | Miseq tail multiplex                          |
| DAZAP - F2A I5 M04F                    | TAC ACT CTT TCC CTA CAC GAC GCT CTT CCG ATC<br>TGA TCT GCC CAG AAA TCA GAA CAA C         | Miseq tail multiplex                          |
| DAZAP - F2A I5 M05F                    | TAC ACT CTT TCC CTA CAC GAC GCT CTT CCG ATC<br>TCT GAA TGC CCA GAA ATC AGA ACA AC        | Miseq tail multiplex                          |
| Bio 12_47 + F1                         | /5BiosG/ GGA CAA CAA CCC CCA GTT AG                                                      | Bio-PCR1                                      |
| 12_47 + F2A I5 M00G                    | TAC ACT CTT TCC CTA CAC GAC GCT CTT CCG ATC<br>TTG TGG TAA AGG AGA CAA TGC T             | Miseq tail                                    |
| 12_47 + F2A I5 M02G                    | TAC ACT CTT TCC CTA CAC GAC GCT CTT CCG ATC<br>TCT TGT GGT AAA GGA GAC AAT GCT           | Miseq tail multiplex                          |
| 12_47 + F2A I5 M03G                    | TAC ACT CTT TCC CTA CAC GAC GCT CTT CCG ATC<br>TGA CTG TGG TAA AGG AGA CAA TGC T         | Miseq tail multiplex                          |
| 12_47 + F2A I5 M04G                    | TAC ACT CTT TCC CTA CAC GAC GCT CTT CCG ATC<br>TAC GTT GTG GTA AAG GAG ACA ATG CT        | Miseq tail multiplex                          |
| 12_47 + F2A I5 M05G                    | TAC ACT CTT TCC CTA CAC GAC GCT CTT CCG ATC<br>TTG ACA TGT GGT AAA GGA GAC AAT GCT       | Miseq tail multiplex                          |
| <b>TALEN sites</b>                     |                                                                                          |                                               |
| Bio ATM + F1                           | /5BiosG/ CTG CTG CCG TCA ACT AGA AC                                                      | Bio-PCR1                                      |
| ATM + F2 I5 M00H                       | TAC ACT CTT TCC CTA CAC GAC GCT CTT CCG ATC<br>TAT TTA AGC GCC TGA TTC GAG               | Miseq tail multiplex                          |
| ATM + F2 I5 M02H                       | TAC ACT CTT TCC CTA CAC GAC GCT CTT CCG ATC<br>TCG ATT TAA GCG CCT GAT TCG AG            | Miseq tail multiplex                          |

|                                                                                                                                                                                                                                                                                |                                                                                   |                      |
|--------------------------------------------------------------------------------------------------------------------------------------------------------------------------------------------------------------------------------------------------------------------------------|-----------------------------------------------------------------------------------|----------------------|
| ATM + F2 I5 M03H                                                                                                                                                                                                                                                               | TAC ACT CTT TCC CTA CAC GAC GCT CTT CCG ATC<br>TTC AAT TTA AGC GCC TGA TTC GAG    | Miseq tail multiplex |
| ATM + F2 I5 M04H                                                                                                                                                                                                                                                               | TAC ACT CTT TCC CTA CAC GAC GCT CTT CCG ATC<br>TAT CTA TTT AAG CGC CTG ATT CGA G  | Miseq tail multiplex |
| ATM + F2 I5 M05H                                                                                                                                                                                                                                                               | TAC ACT CTT TCC CTA CAC GAC GCT CTT CCG ATC<br>TCC GCG ATT TAA GCG CCT GAT TCG AG | Miseq tail multiplex |
| ATM + F2 I5 M05H2                                                                                                                                                                                                                                                              | TAC ACT CTT TCC CTA CAC GAC GCT CTT CCG ATC<br>TTG TAC ATT TAA GCG CCT GAT TCG AG | Miseq tail multiplex |
| Bio MYC + F1                                                                                                                                                                                                                                                                   | /5BiosG/ CGA AAC TTT GCC CAT AGC AG                                               | Bio-PCR1             |
| MYC + F2 I5 M001                                                                                                                                                                                                                                                               | TAC ACT CTT TCC CTA CAC GAC GCT CTT CCG ATC<br>TCT TAC AAC ACC CGA GCA AGG        | Miseq tail multiplex |
| MYC + F2 I5 M031                                                                                                                                                                                                                                                               | TAC ACT CTT TCC CTA CAC GAC GCT CTT CCG ATC<br>TAG CCT TAC AAC ACC CGA GCA AGG    | Miseq tail multiplex |
| MYC + F2 I5 M041                                                                                                                                                                                                                                                               | TAC ACT CTT TCC CTA CAC GAC GCT CTT CCG ATC<br>TCT CGC TTA CAA CAC CCG AGC AAG G  | Miseq tail multiplex |
| MYC + F2 I5 M051                                                                                                                                                                                                                                                               | TAC ACT CTT TCC CTA CAC GAC GCT CTT CCG ATC<br>TTG TAT CTT ACA ACA CCC GAG CAA GG | Miseq tail multiplex |
|                                                                                                                                                                                                                                                                                |                                                                                   |                      |
| <p>**Color code: Green = adapter sequence complementarity; Blue = multiplex sequence; Red = Terminal ends for MiSeq; Orange = Internal MiSeq priming sequence; /5phos/ = 5' phosphorylation; /3InvdT/ = 3' inverted dT; /5BiosG/ = 5' Biotin; /3AmMO/ = 3' Amino modified.</p> |                                                                                   |                      |

## Supplementary References

47. Schueler, M.G. & Sullivan, B.A. Structural and functional dynamics of human centromeric chromatin. *Annu. Rev. Genomics Hum. Genet.* **7**, 301-313 (2006).
